# Supplementary material for: Post-polymerisation modification of poly(3-hydroxybutyrate) (PHB) using thiol–ene and phosphine addition
Source: Royal Society of Chemistry journal article supplement (doi:10.1039/d3py00272a), 2023-01-01
Supplement: d3py00272a1.pdf [file d3py00272a1.pdf]

## Electronic Supplementary Information (ESI)

### Post-Polymerisation Modification of Poly(3-hydroxybutyrate) (PHB) using Thiol-ene and Phosphine Addition

Lucas Al-Shok,<sup>a</sup> James S. Town,<sup>a</sup> Despina Coursari,<sup>a</sup> Paul Wilson,<sup>a</sup> David M. Haddleton<sup>\*a</sup>

a. Department of Chemistry, University of Warwick, Coventry, CV4 7AL, UK. E-mail: d.m.haddleton@warwick.ac.uk

## 1 Data

### 1.1 NMR of starting materials

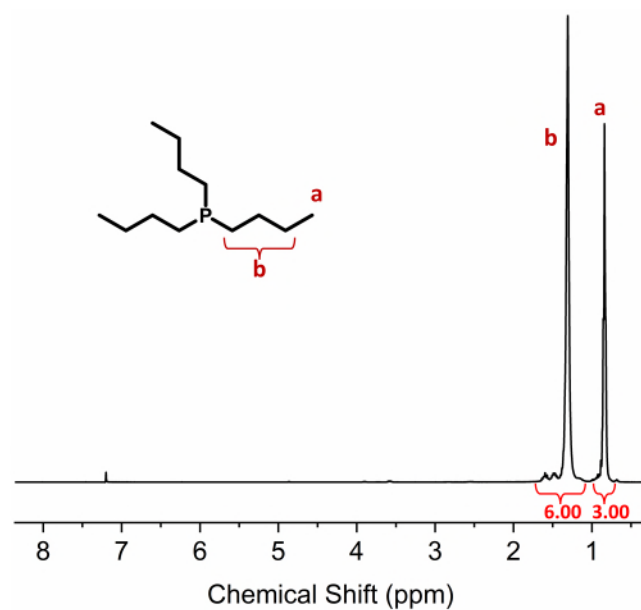

Figure S1: <sup>1</sup>H-NMR spectrum (400 MHz, CDCl<sub>3</sub>) of tributylphosphine.

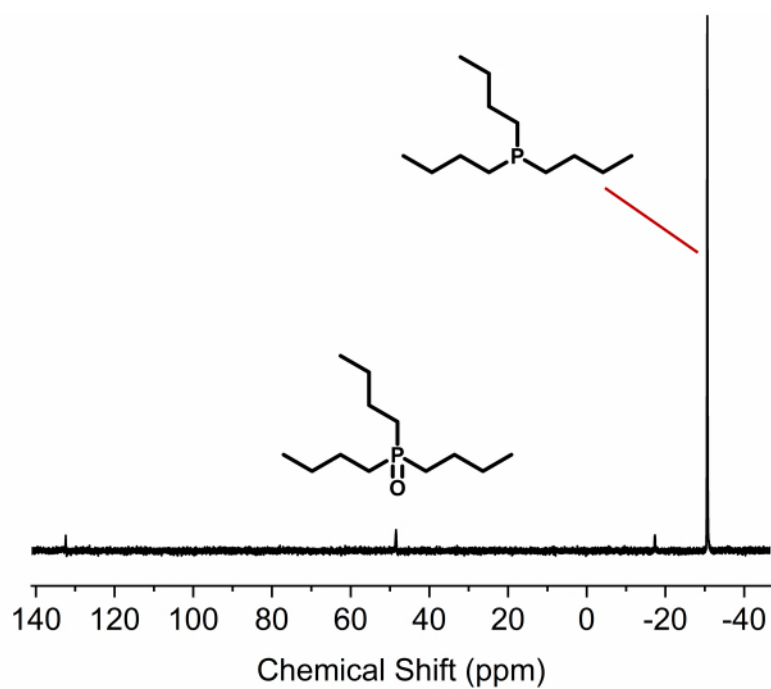

Figure S2:  $^{31}\text{P}$  NMR spectrum (162 MHz,  $\text{CDCl}_3$ ) of tributylphosphine.

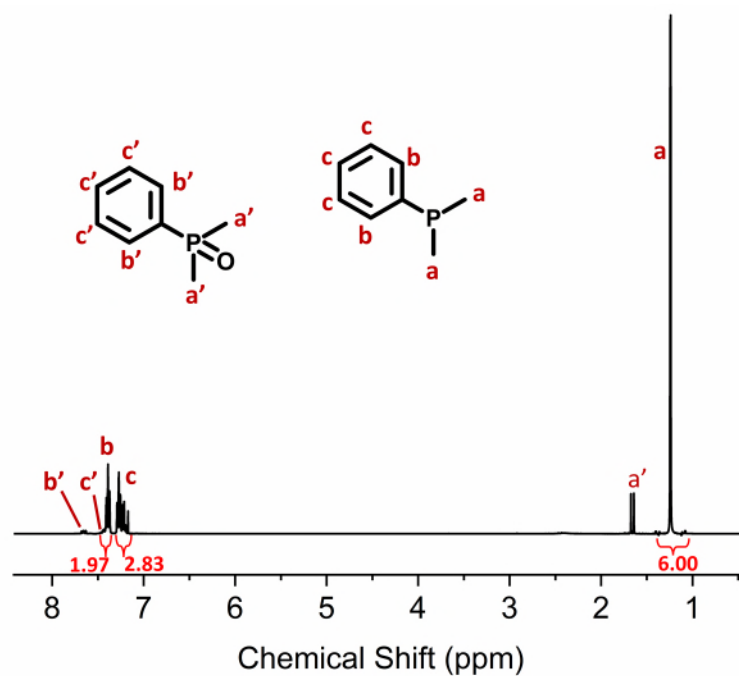

Figure S3:  $^1\text{H}$  NMR spectrum (400 MHz,  $\text{CDCl}_3$ ) of dimethylphenylphosphine.

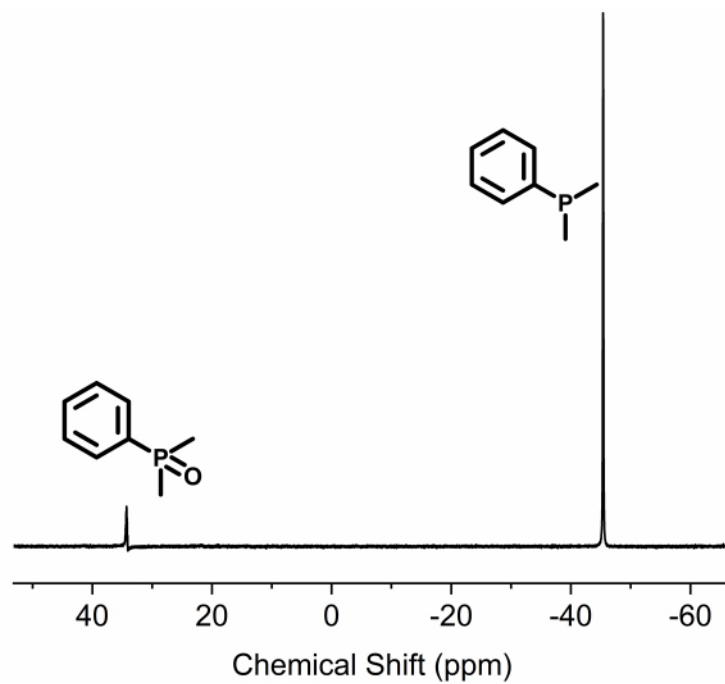

Figure S4:  $^{31}\text{P}$  NMR spectrum (162 MHz,  $\text{CDCl}_3$ ) of dimethylphenylphosphine.

## 1.2 Polymer-Synthesis

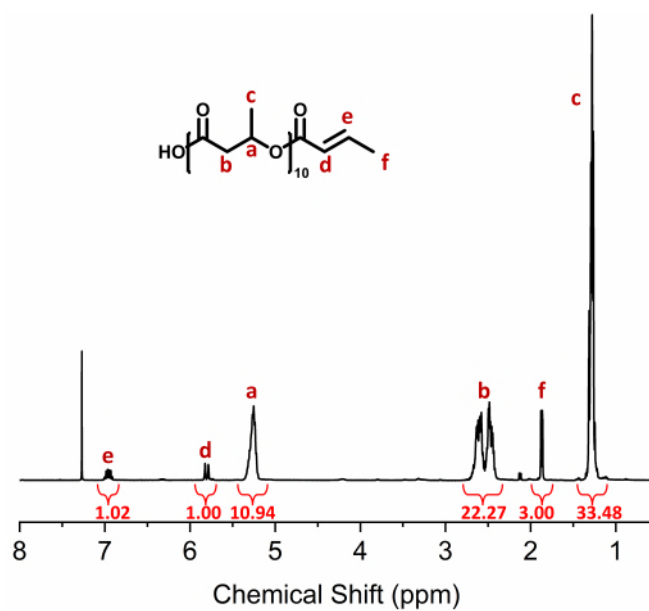

Figure S5:  $^1\text{H}$  NMR spectrum (400 MHz,  $\text{CDCl}_3$ ) of low molecular weight PHB.

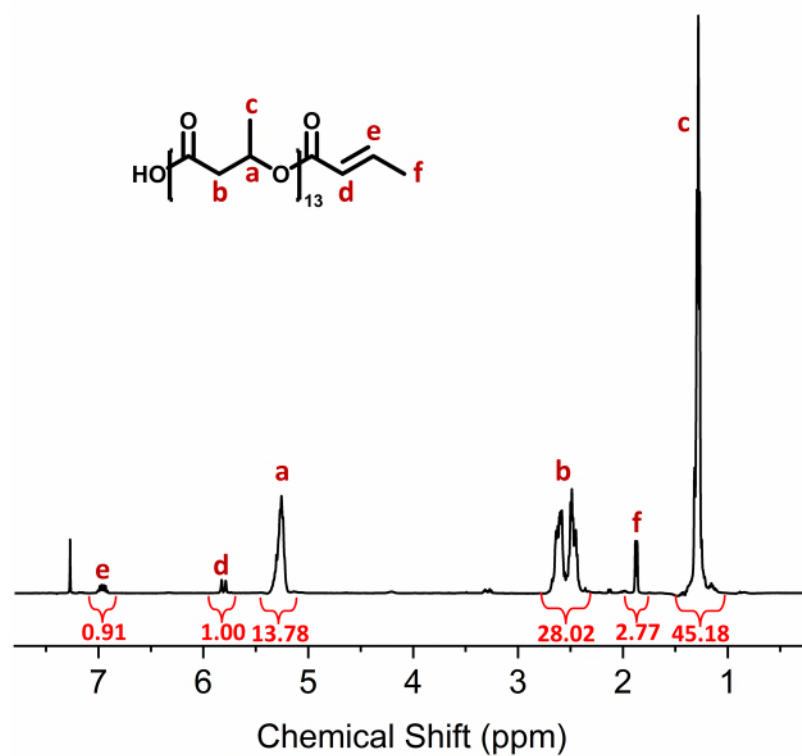

Figure S6:  $^1\text{H}$  NMR spectrum (400 MHz,  $\text{CDCl}_3$ ) of medium molecular weight PHB.

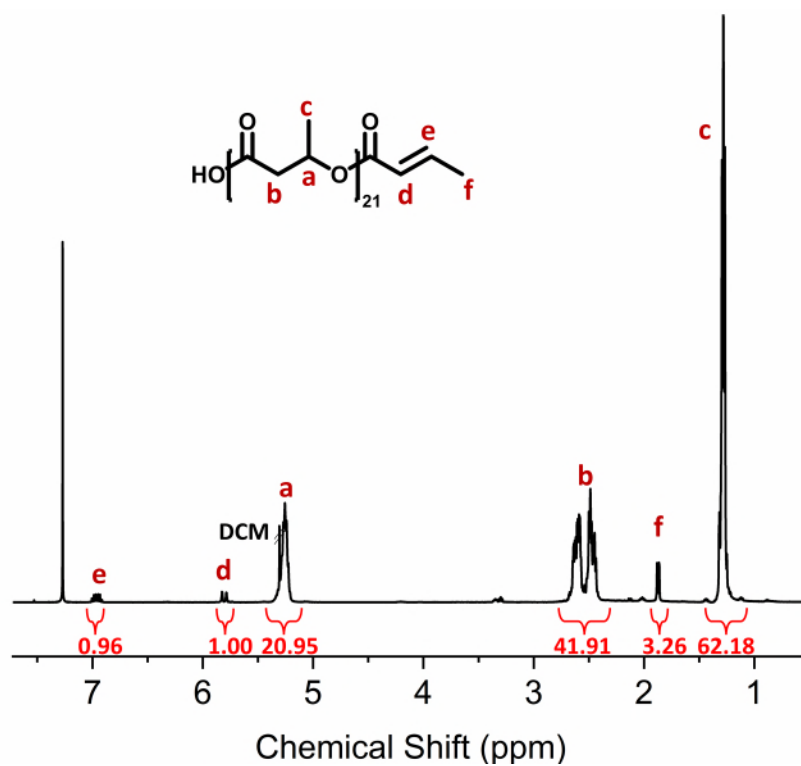

Figure S7:  $^1\text{H}$  NMR spectrum (400 MHz,  $\text{CDCl}_3$ ) of medium-high molecular weight PHB.

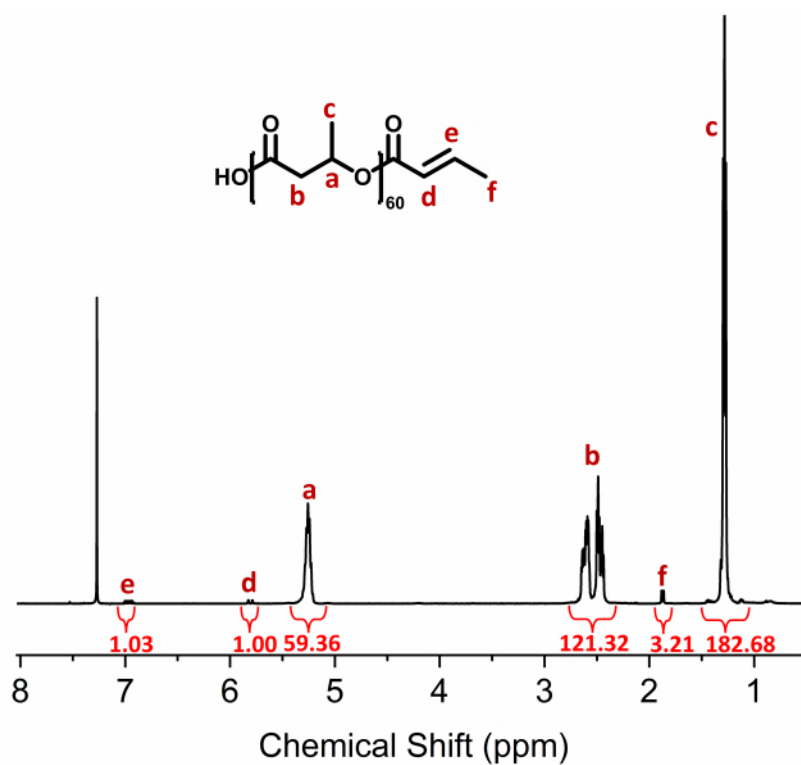

Figure S8:  $^1\text{H}$  NMR spectrum (400 MHz,  $\text{CDCl}_3$ ) of high molecular weight PHB.

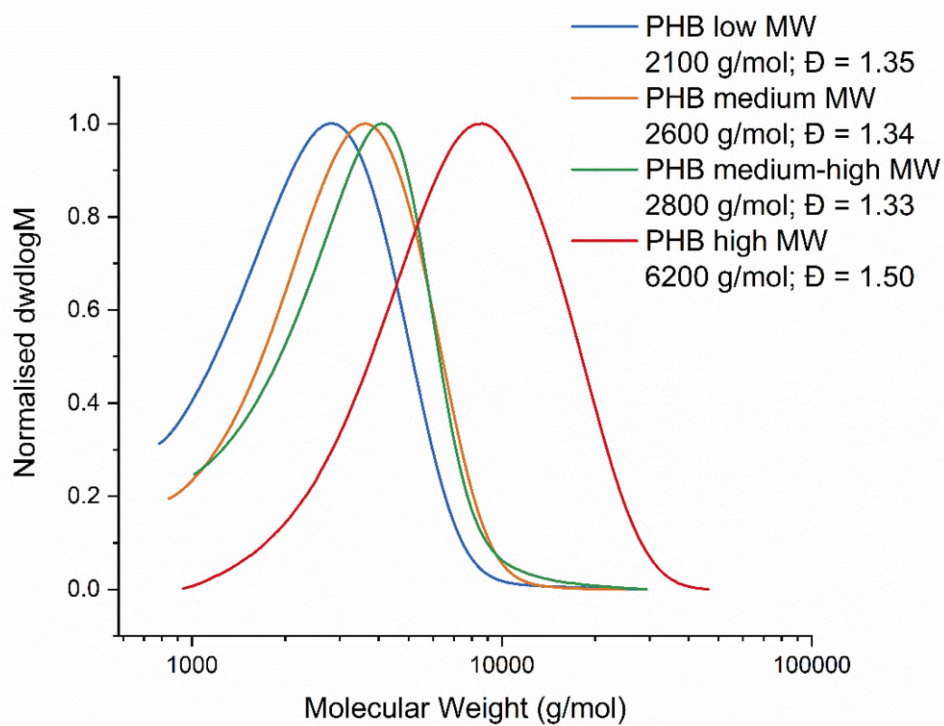

Figure S9: Size-exclusion chromatogram showing distributions of molecular weights of synthetic PHB.

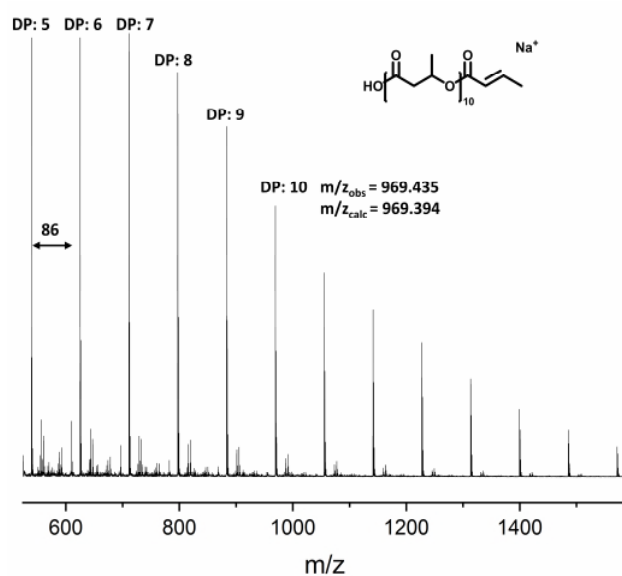

Figure S10: MALDI-ToF spectrum of low molecular weight PHB, measured via reflectron positive ion mode.

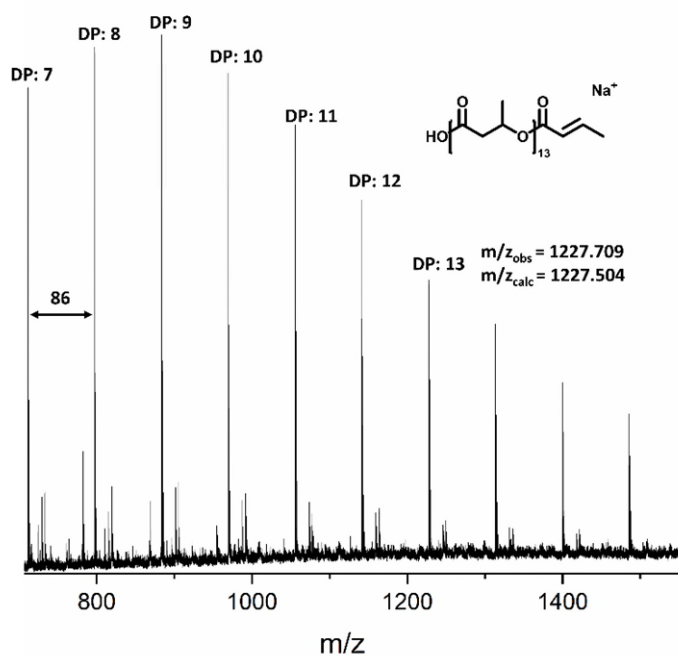

Figure S11: MALDI-ToF spectrum of medium molecular weight PHB, measured via reflectron positive ion mode.

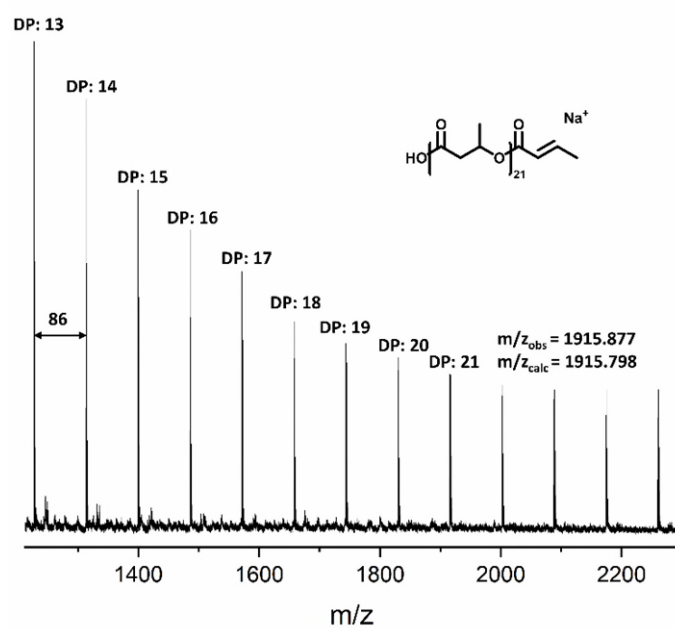

Figure S12: MALDI-ToF spectrum of medium-high molecular weight PHB, measured via reflectron positive ion mode.

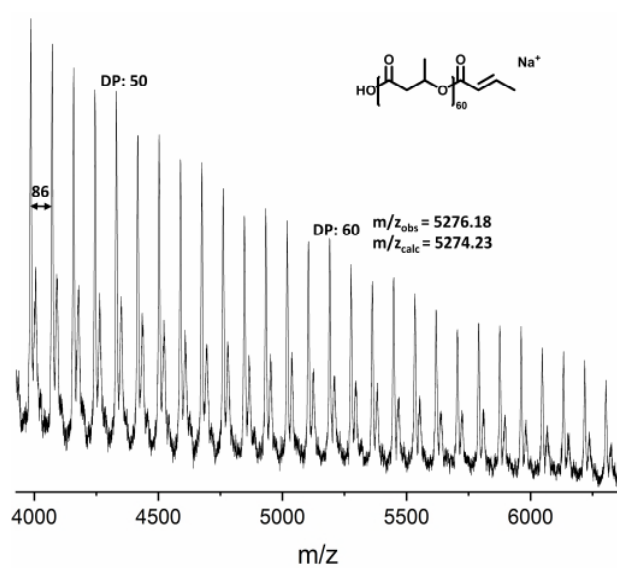

Figure S13: MALDI-ToF spectrum of high molecular weight PHB, measured via linear positive ion mode.

### 1.3 Polymer Functionalisation

#### Low molecular weight PHB

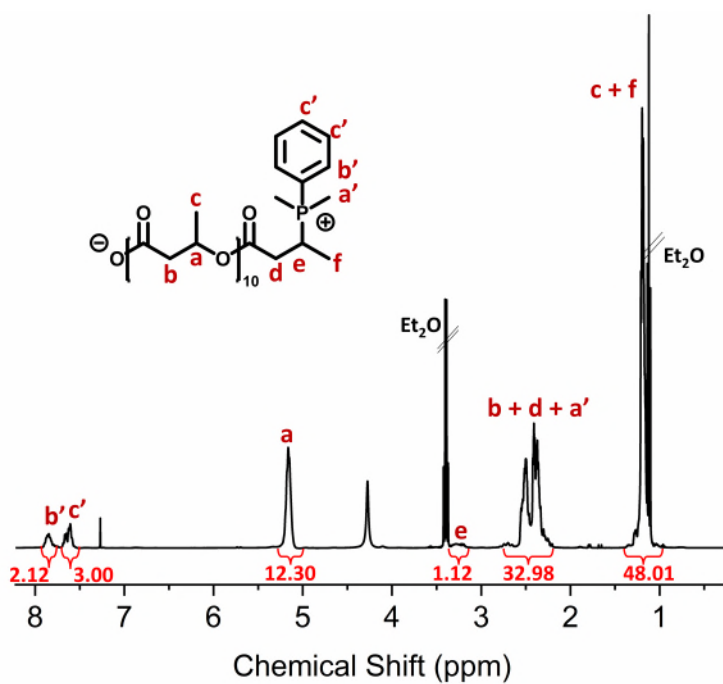

Figure S14:  $^1\text{H}$ -NMR (400 MHz,  $\text{CDCl}_3$ ) of low molecular weight PHB functionalised with DMPP.

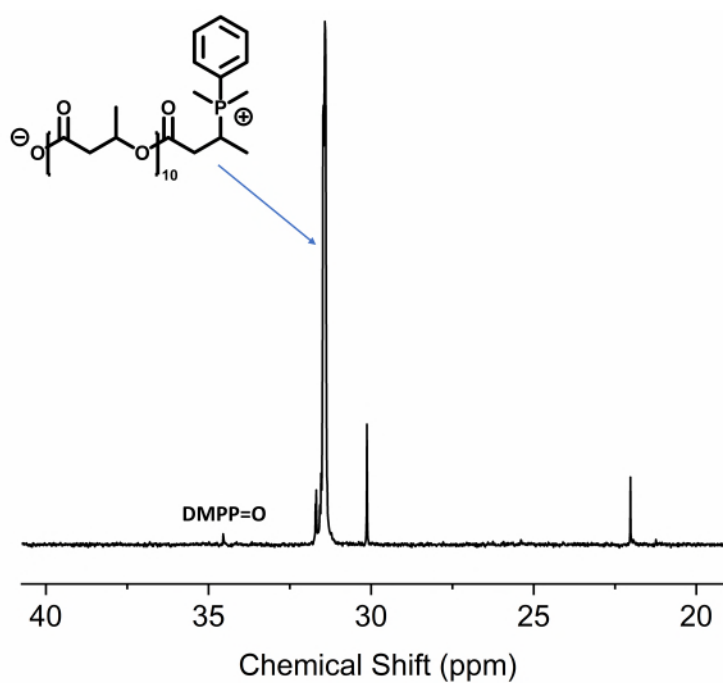

Figure S15:  $^{31}\text{P}$ -NMR (162 MHz,  $\text{CDCl}_3$ ) of low molecular weight PHB functionalised with DMPP.

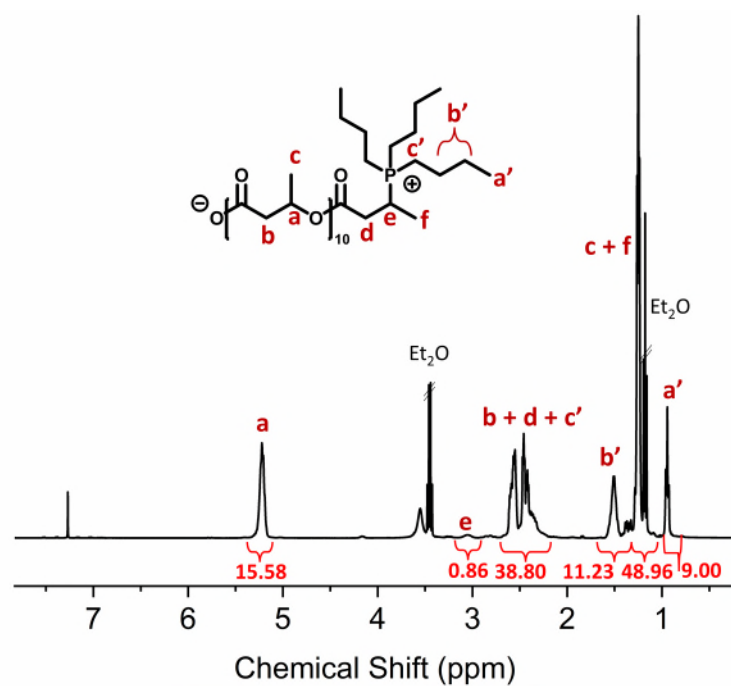

Figure S16: <sup>1</sup>H-NMR (400 MHz, CDCl<sub>3</sub>) of low molecular weight PHB functionalised with Bu<sub>3</sub>P.

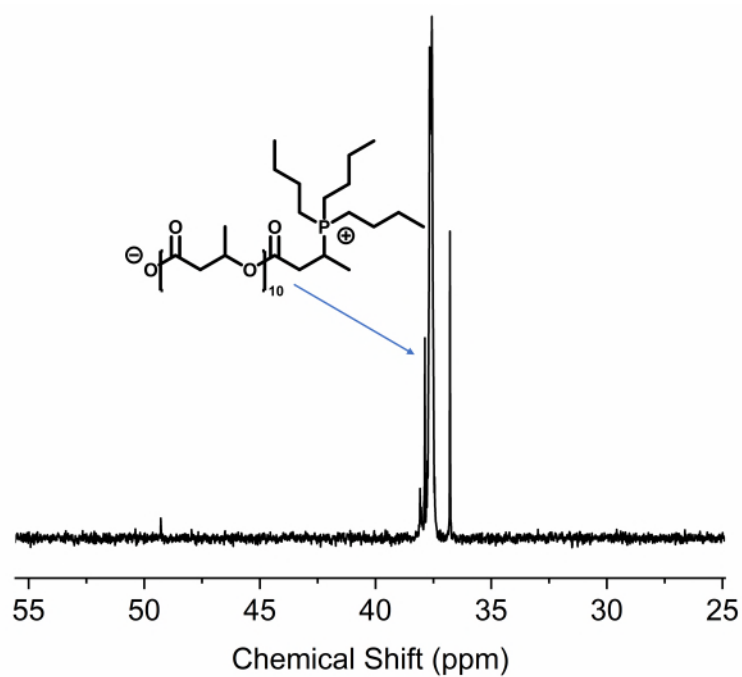

Figure S17: <sup>31</sup>P-NMR (162 MHz CDCl<sub>3</sub>) of low molecular weight PHB functionalised with Bu<sub>3</sub>P.

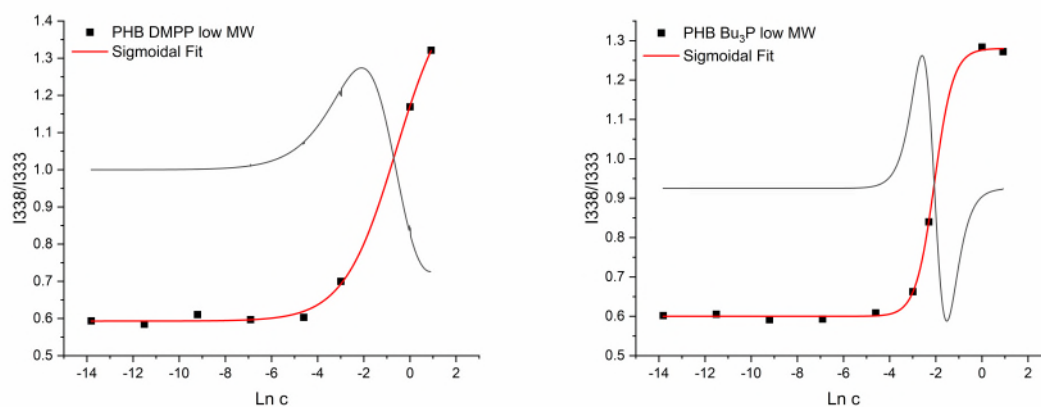

Figure S18: Plots of the relationship between fluorescence emission at 338 nm and 333 nm with a logarithmic concentration, measured for different low molecular weight polymer adduct concentrations in the presence of pyrene. PHB DMPP (left), PHB Bu<sub>3</sub>P (right).

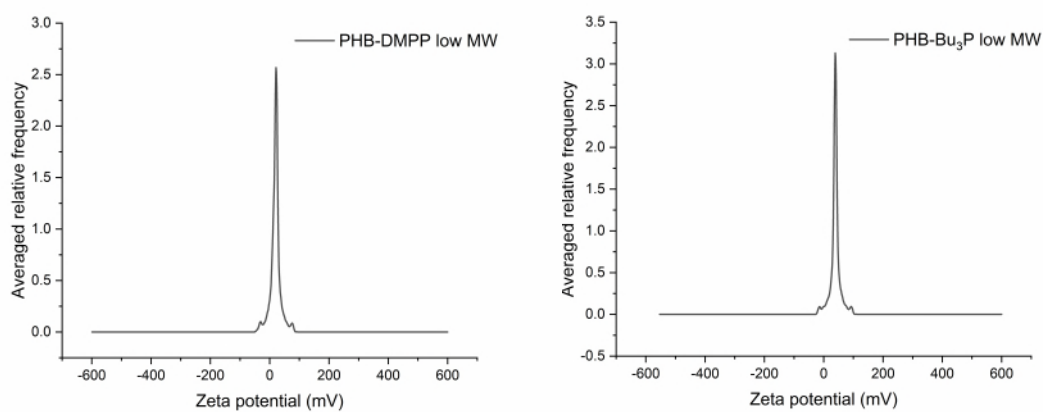

Figure S19: Zeta potential recorded for low molecular weight PHB functionalised with DMPP (left) and Bu<sub>3</sub>P (right), respectively.

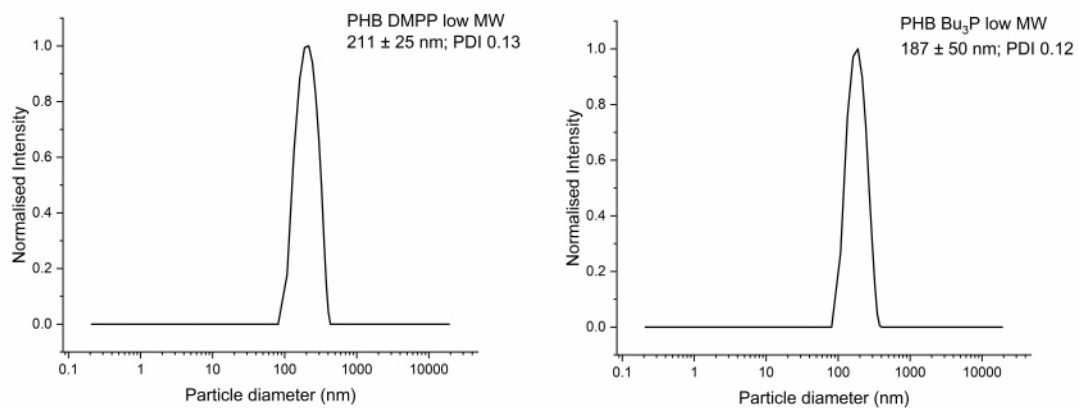

Figure S20: Intensity-weighted particle diameter measured via dynamic light scattering recorded for low molecular weight PHB functionalised with DMPP (left) and Bu<sub>3</sub>P (right), respectively.

## Thiol-ene functionalisation

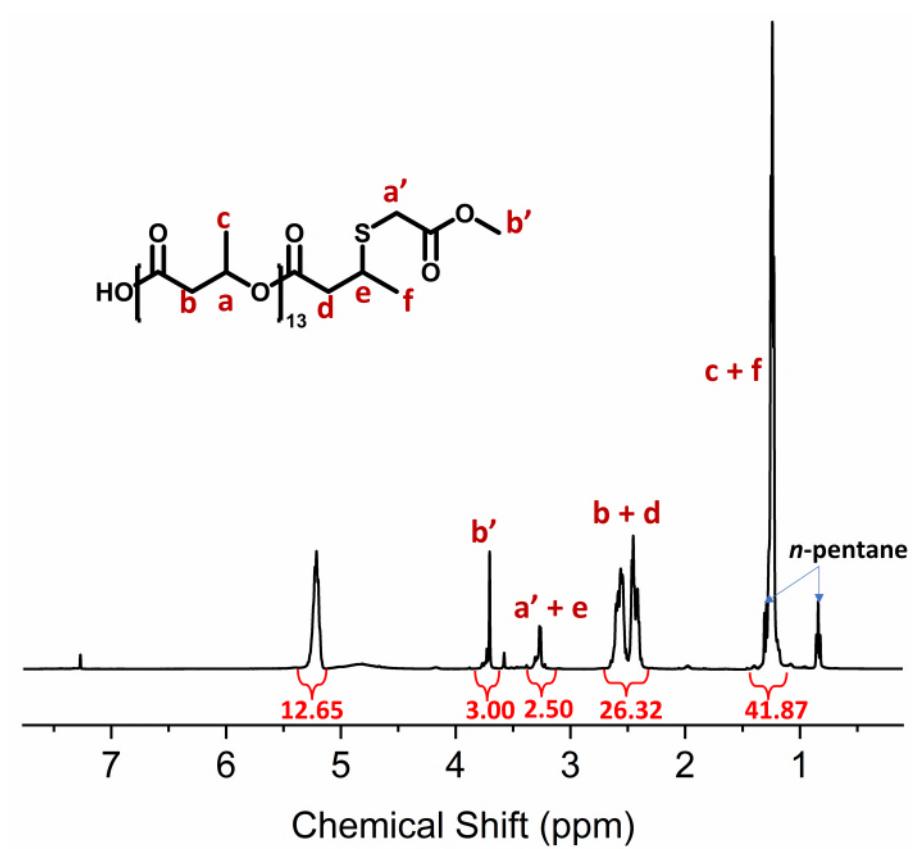

Figure S21:  $^1\text{H}$ -NMR of PHB functionalised with MTG via thiol-ene click chemistry.

## Medium molecular weight PHB

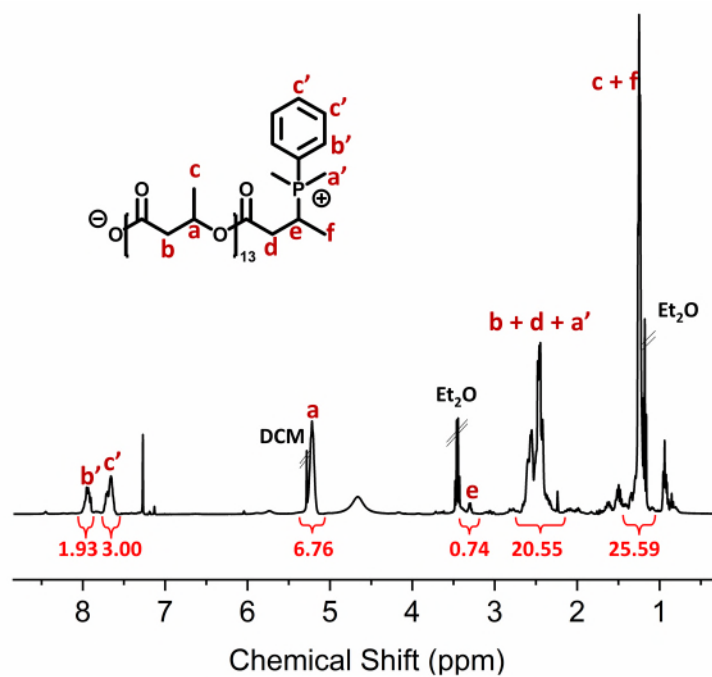

Figure S22: <sup>1</sup>H-NMR (400 MHz, CDCl<sub>3</sub>) of medium molecular weight PHB functionalised with DMPP.

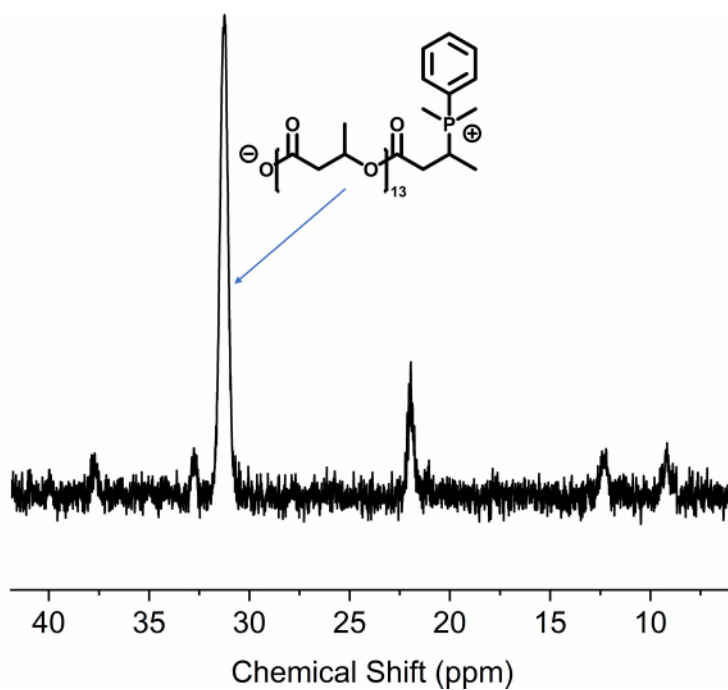

Figure S23: <sup>31</sup>P-NMR (162 MHz, CDCl<sub>3</sub>) of medium molecular weight PHB functionalised with DMPP.

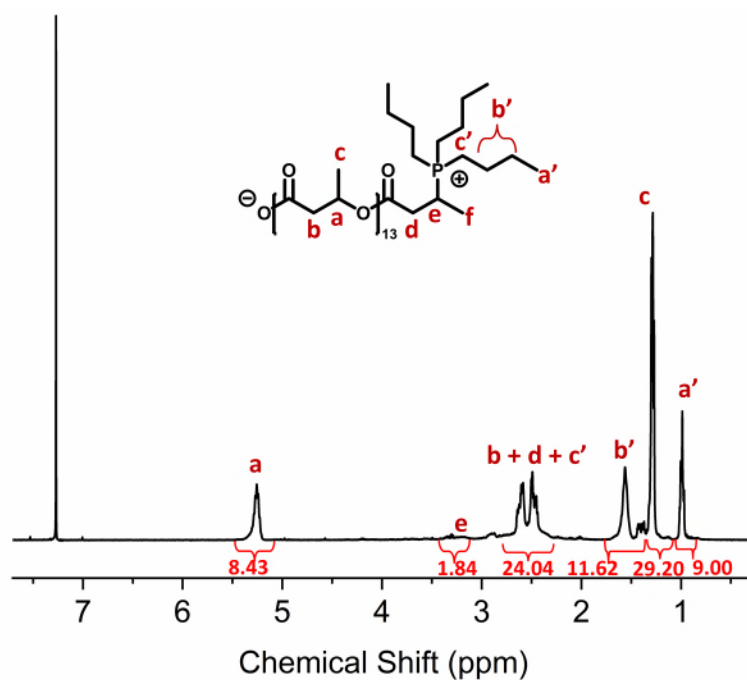

Figure S24:  $^1\text{H}$ -NMR (400 MHz,  $\text{CDCl}_3$ ) of medium molecular weight PHB functionalised with  $\text{Bu}_3\text{P}$ .

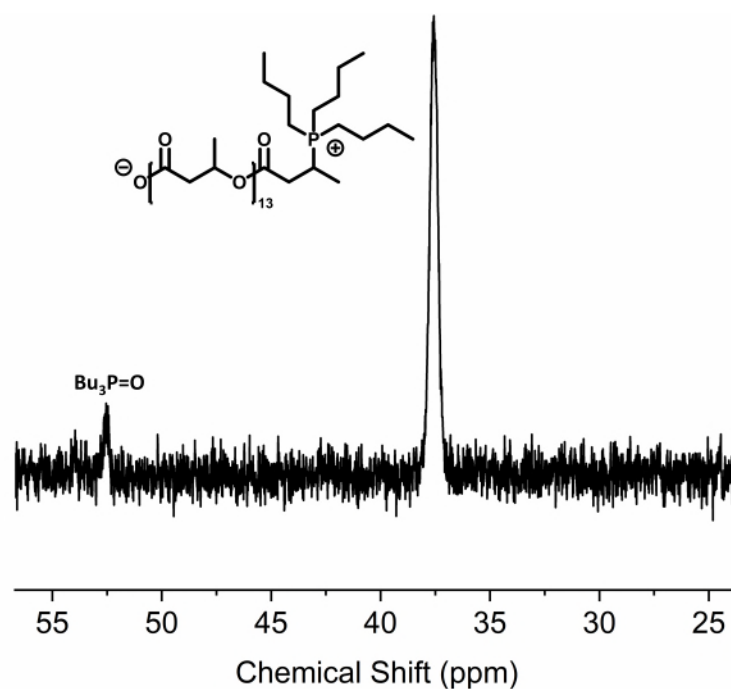

Figure S25:  $^{31}\text{P}$ -NMR (162 MHz,  $\text{CDCl}_3$ ) of medium molecular weight PHB functionalised with  $\text{Bu}_3\text{P}$ .

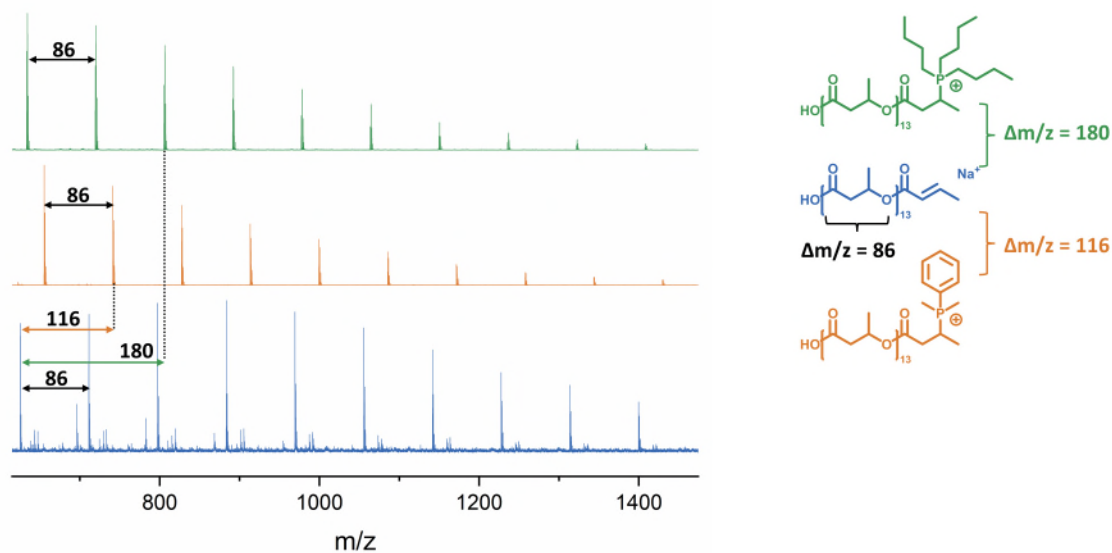

Figure S26: MALDI-ToF spectra of unfunctionalised (uf) medium molecular weight PHB compared to PHB functionalised with DMPP and Bu<sub>3</sub>P, respectively.

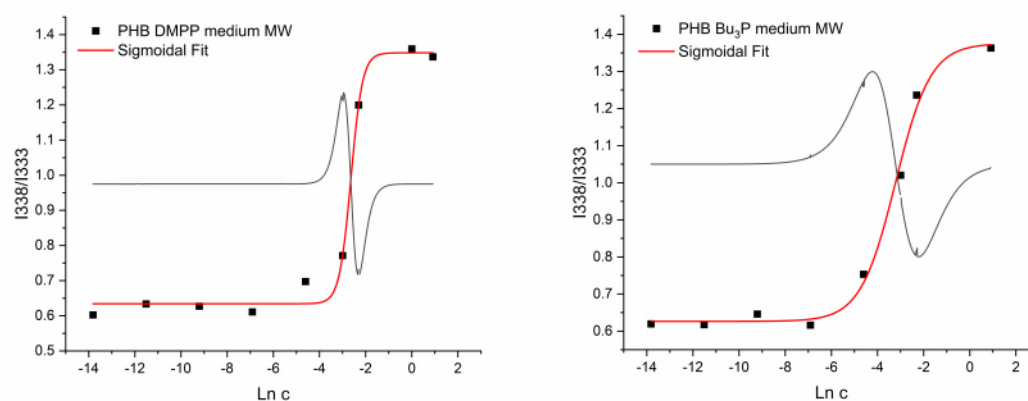

Figure S27: Plots of the relationship between fluorescence emission at 338 nm and 333 nm with a logarithmic concentration, measured for different medium molecular weight polymer adduct concentrations in the presence of pyrene. PHB DMPP (left), PHB Bu<sub>3</sub>P (right).

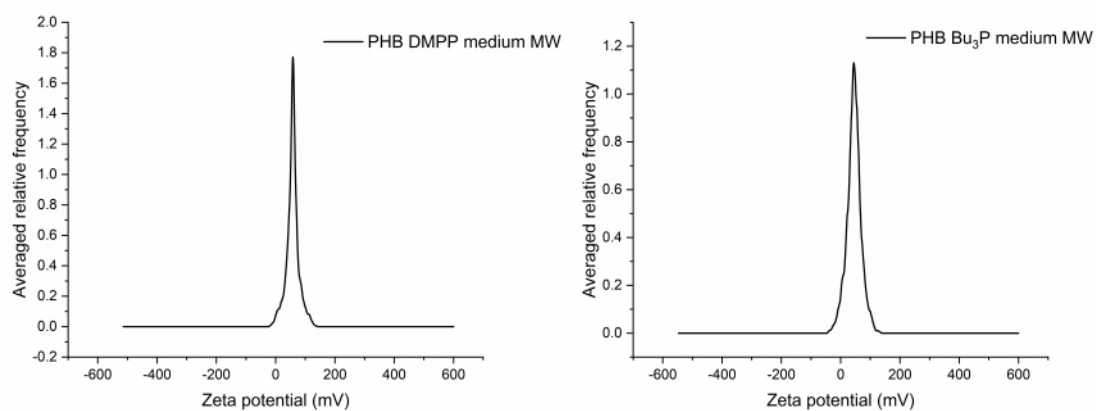

Figure S28: Zeta potential recorded for medium molecular weight PHB functionalised with DMPP (left) and Bu<sub>3</sub>P (right), respectively.

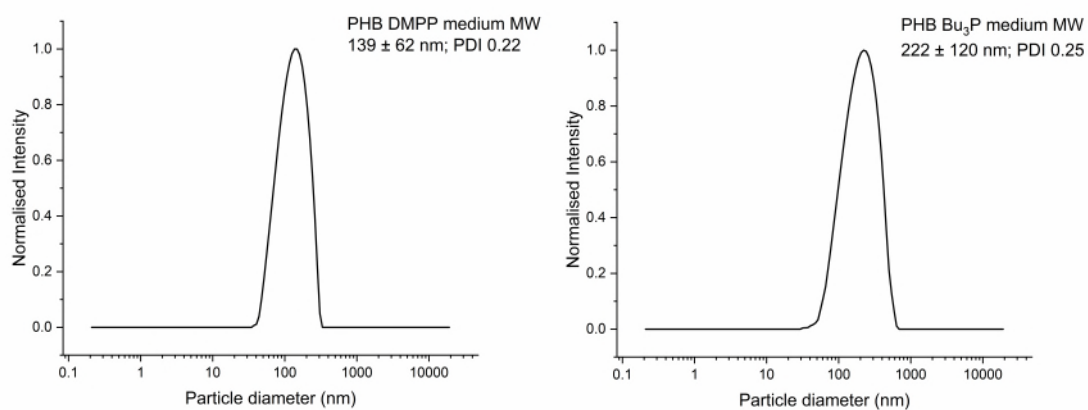

Figure S29: Intensity-weighted particle diameter measured via dynamic light scattering recorded for medium molecular weight PHB functionalised with DMPP (left) and Bu<sub>3</sub>P (right), respectively.

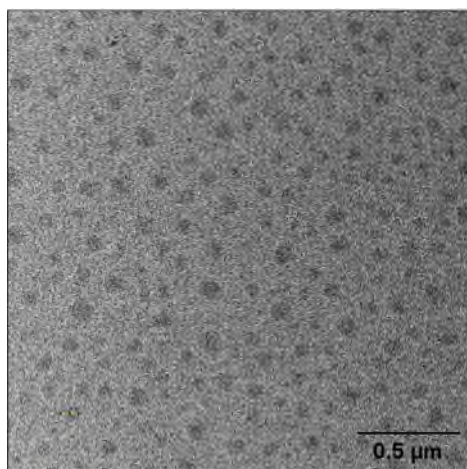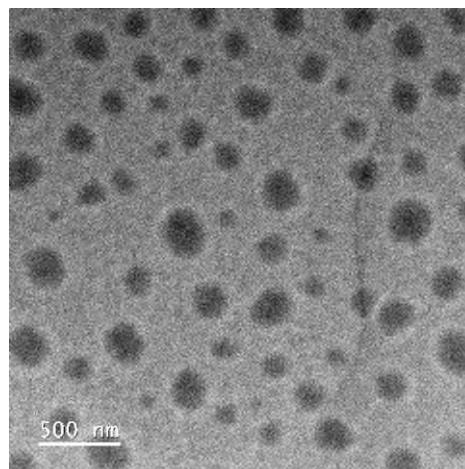

Figure S30: TEM pictures taken for medium molecular weight PHB, functionalised with DMPP (left) and Bu<sub>3</sub>P (right), respectively. Samples were prepared by drying aqueous polymer suspensions.

## Medium high molecular weight PHB

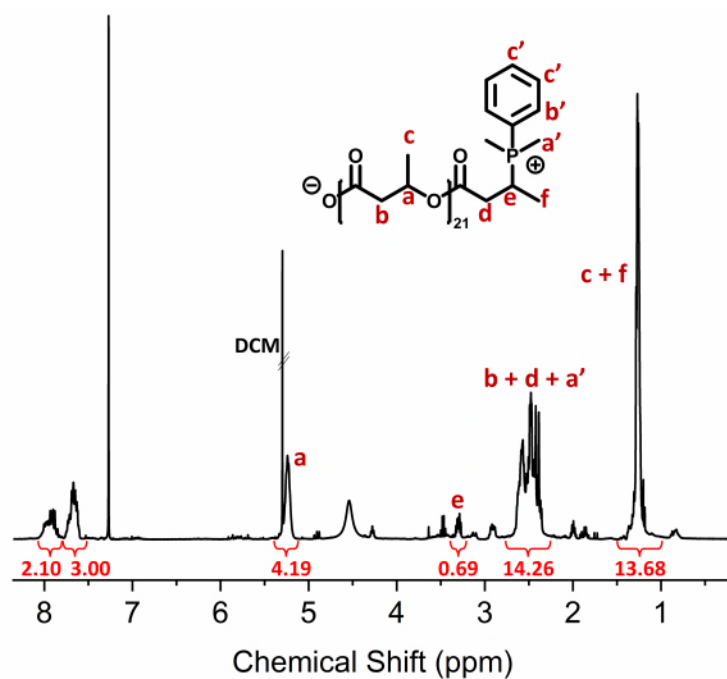

Figure S31:  $^1\text{H}$ -NMR (400 MHz,  $\text{CDCl}_3$ ) of medium high molecular weight PHB functionalised with DMPP.

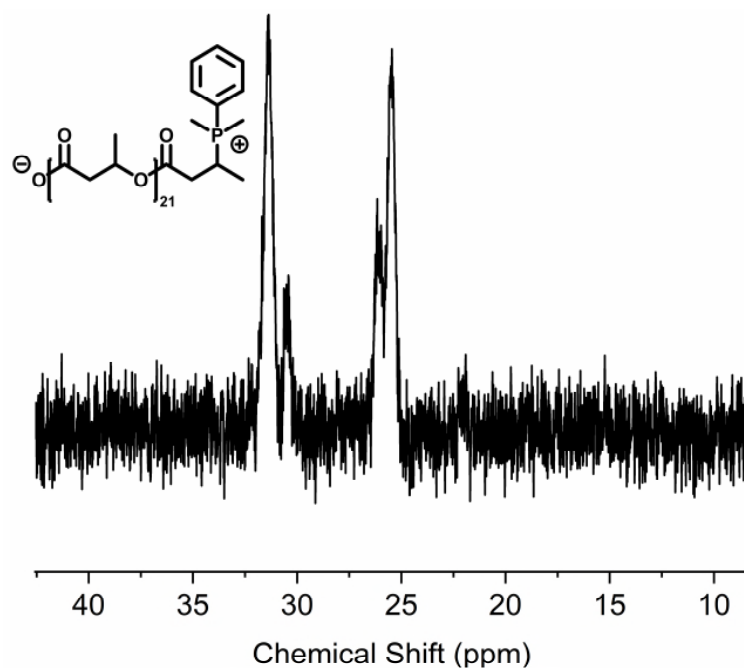

Figure S32:  $^{31}\text{P}$ -NMR (162 MHz,  $\text{CDCl}_3$ ) of medium high molecular weight PHB functionalised with DMPP.

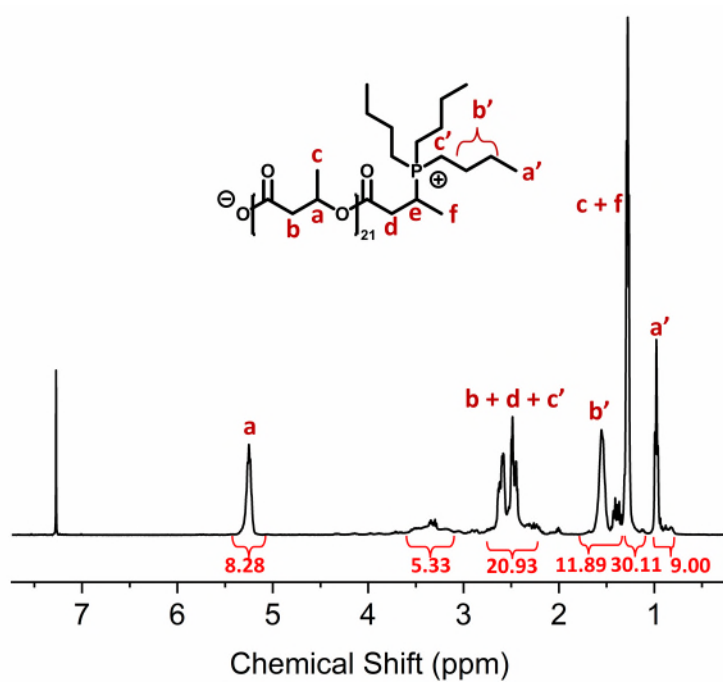

Figure S33:  $^1\text{H}$ -NMR (400 MHz,  $\text{CDCl}_3$ ) of medium high molecular weight PHB functionalised with  $\text{Bu}_3\text{P}$ .

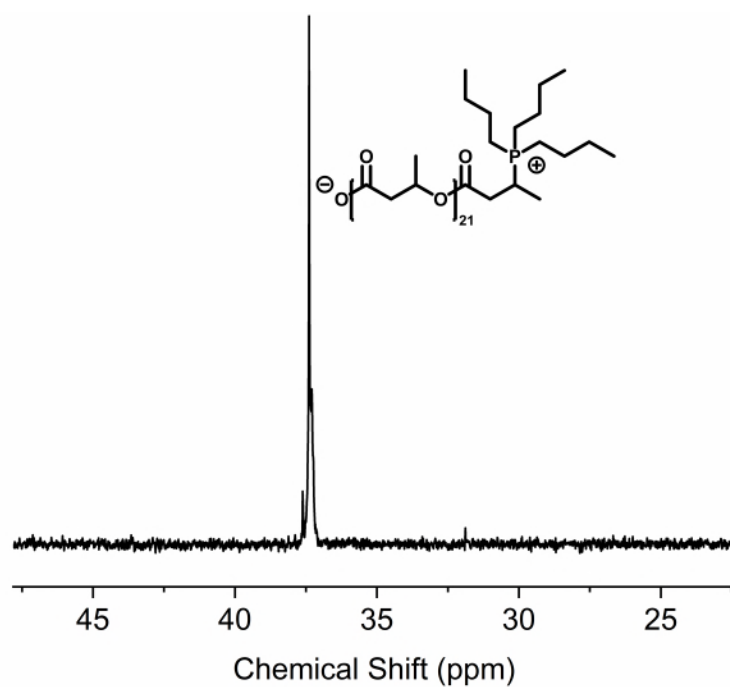

Figure S34:  $^{31}\text{P}$ -NMR (162 MHz,  $\text{CDCl}_3$ ) of medium high molecular weight PHB functionalised with  $\text{Bu}_3\text{P}$ .

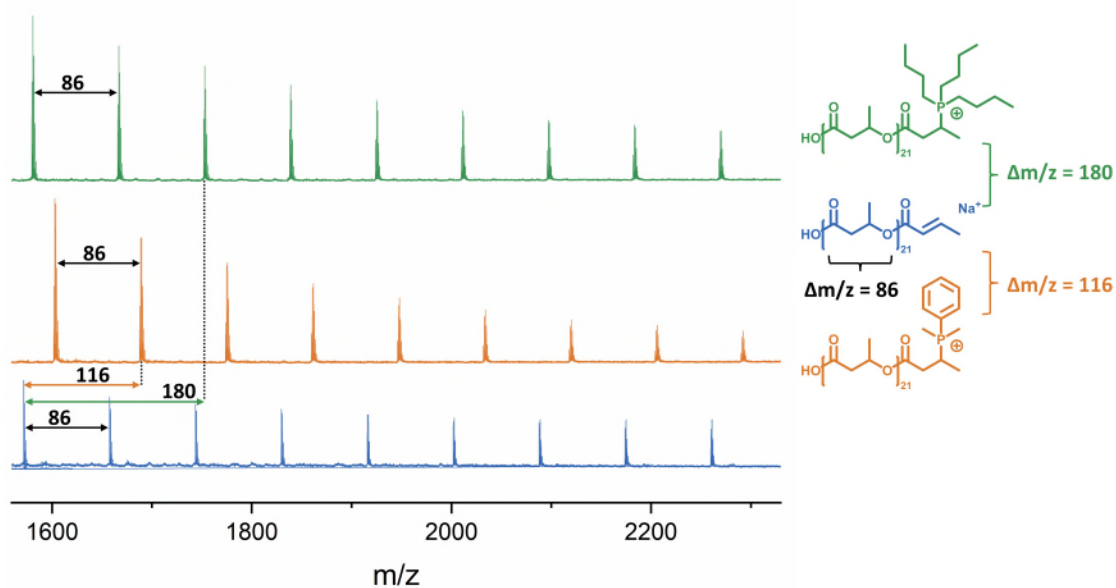

Figure S35: MALDI-ToF spectra of unfunctionalised (uf) medium high molecular weight PHB compared to PHB functionalised with DMPP and Bu<sub>3</sub>P, respectively.

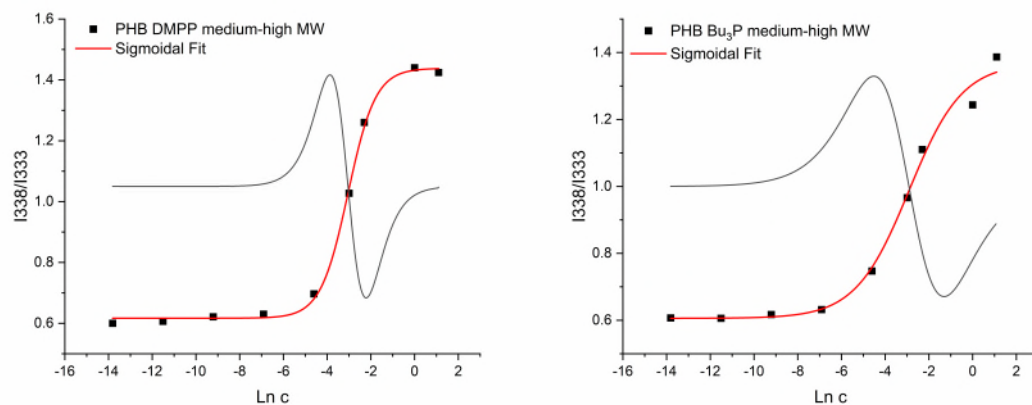

Figure S36: Plots of the relationship between fluorescence emission at 338 nm and 333 nm with a logarithmic concentration, measured for different medium high molecular weight polymer adduct concentrations in the presence of pyrene. PHB DMPP (left), PHB Bu<sub>3</sub>P (right).

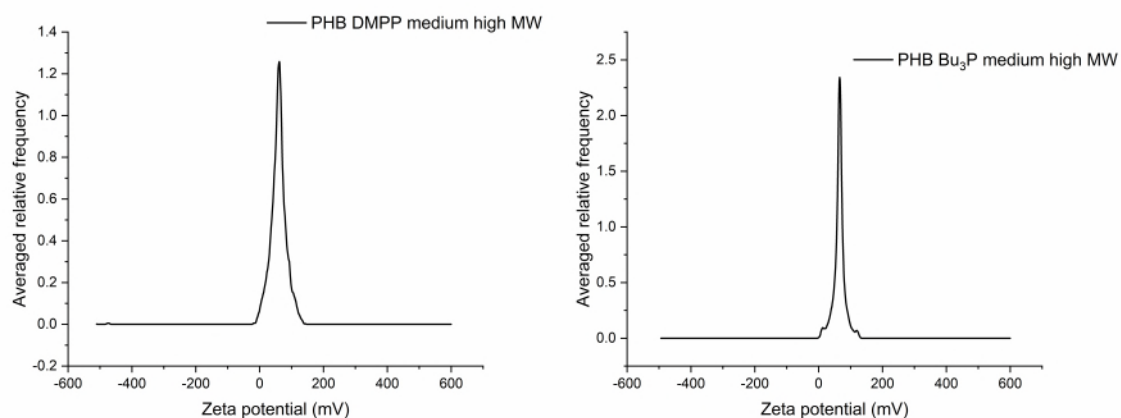

Figure S37: Zeta potential recorded for medium high molecular weight PHB functionalised with DMPP (left) and Bu<sub>3</sub>P (right), respectively.

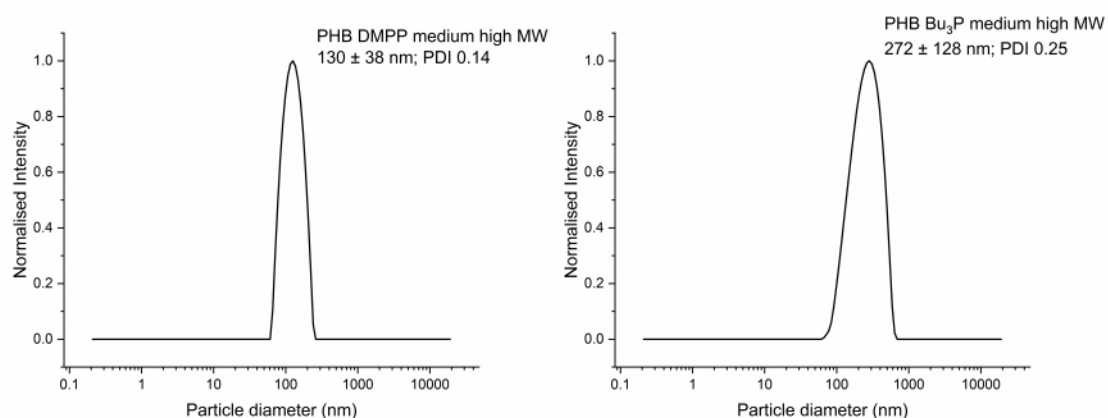

Figure S38: Intensity-weighted particle diameter measured via dynamic light scattering recorded for medium high molecular weight PHB functionalised with DMPP (left) and Bu<sub>3</sub>P (right), respectively.

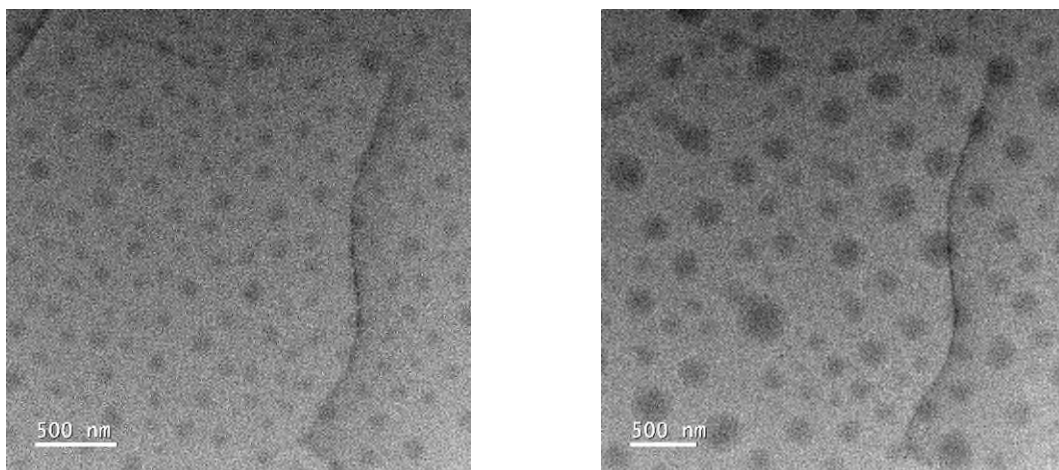

Figure S39: TEM pictures taken for medium high molecular weight PHB, functionalised with DMPP (left) and Bu<sub>3</sub>P (right), respectively. Samples were prepared by drying aqueous polymer suspensions.

## High molecular weight PHB

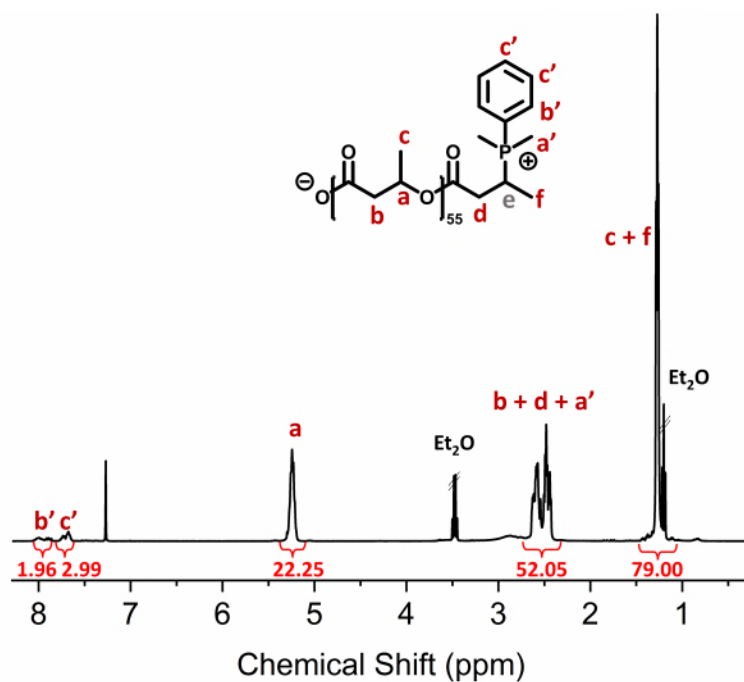

Figure S40: <sup>1</sup>H-NMR (400 MHz, CDCl<sub>3</sub>) of high molecular weight PHB functionalised with DMPP.

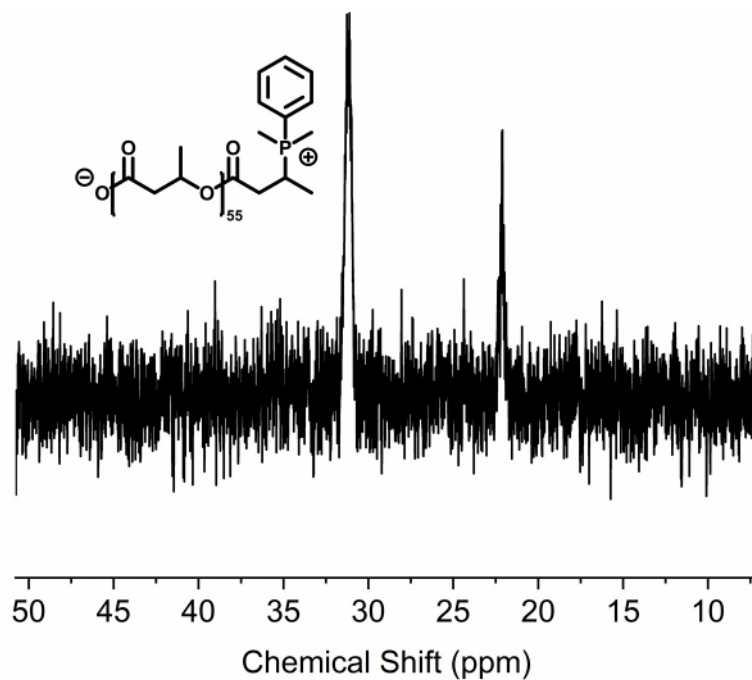

Figure S41: <sup>31</sup>P-NMR (162 MHz, CDCl<sub>3</sub>) of high molecular weight PHB functionalised with DMPP.

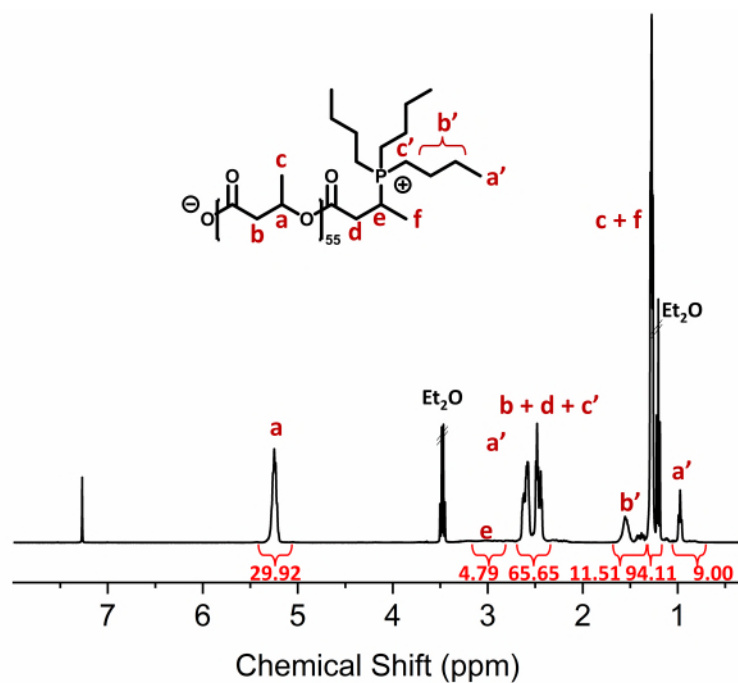

Figure S42:  $^1\text{H}$ -NMR (400 MHz,  $\text{CDCl}_3$ ) of high molecular weight PHB functionalised with  $\text{Bu}_3\text{P}$ .

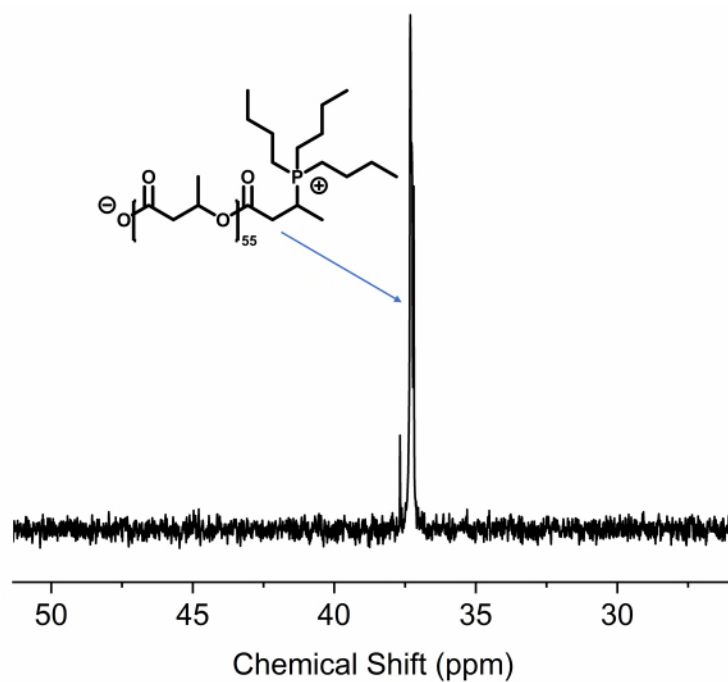

Figure S43:  $^{31}\text{P}$ -NMR (162 MHz,  $\text{CDCl}_3$ ) of high molecular weight PHB functionalised with  $\text{Bu}_3\text{P}$ .

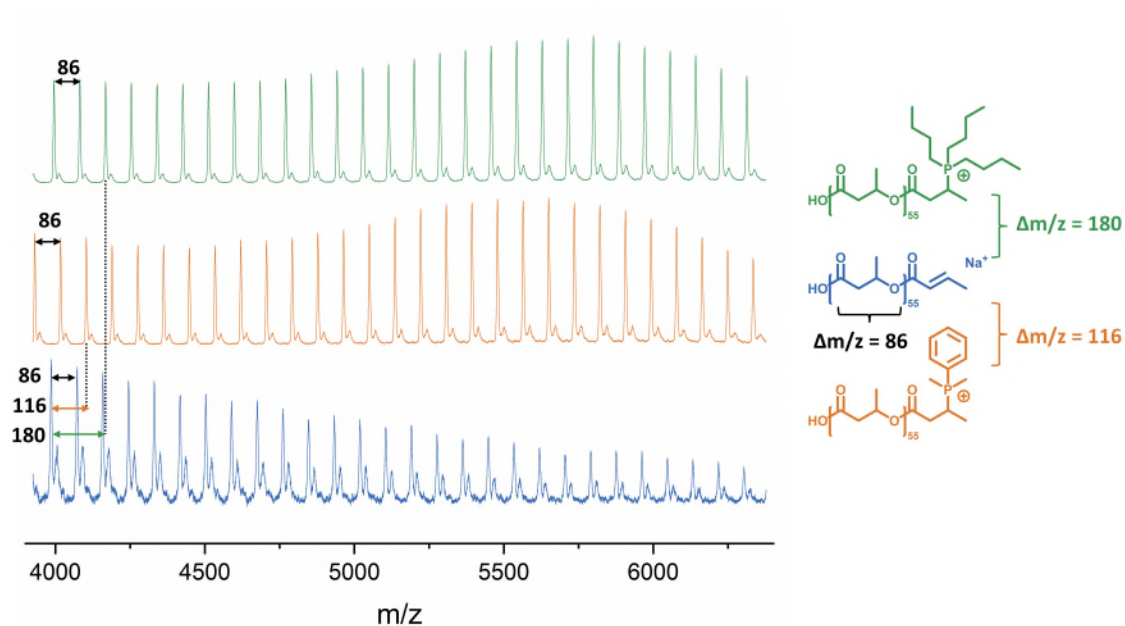

Figure S44: MALDI-ToF spectra of unfunctionalised (uf) high molecular weight PHB compared to PHB functionalised with DMPP and Bu<sub>3</sub>P, respectively. All spectra have been measured in linear mode.

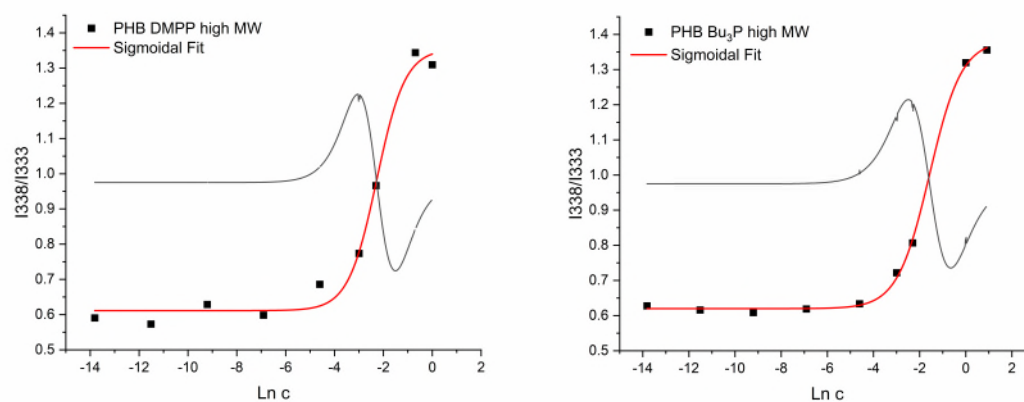

Figure S45: Plots of the relationship between fluorescence emission at 338 nm and 333 nm with a logarithmic concentration, measured for different high molecular weight polymer adduct concentrations in the presence of pyrene. PHB DMPP (left), PHB Bu<sub>3</sub>P (right).

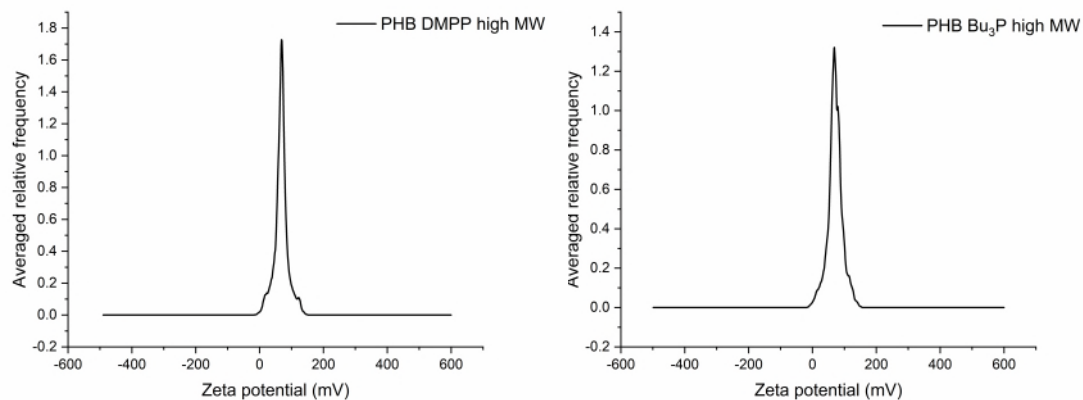

Figure S46: Zeta potential recorded for high molecular weight PHB functionalised with DMPP (left) and Bu<sub>3</sub>P (right), respectively.

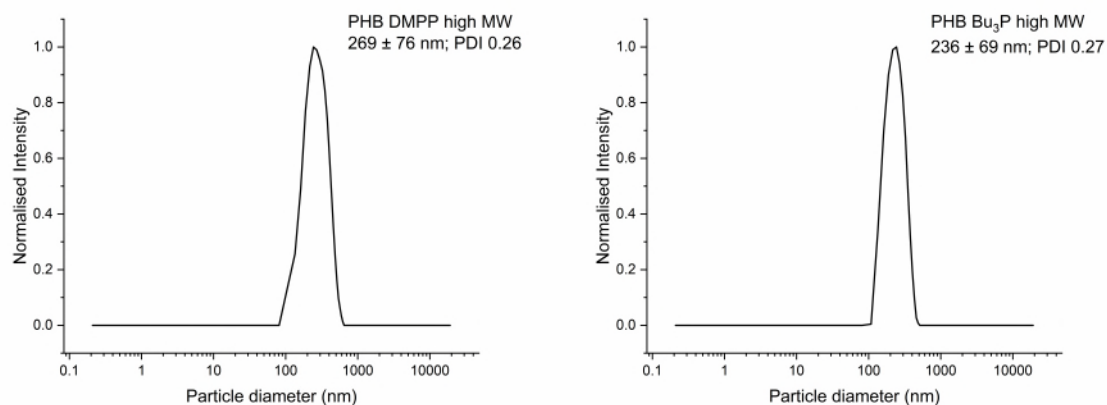

Figure S47: Intensity-weighted particle diameter measured via dynamic light scattering recorded for high molecular weight PHB functionalised with DMPP (left) and Bu<sub>3</sub>P (right), respectively.

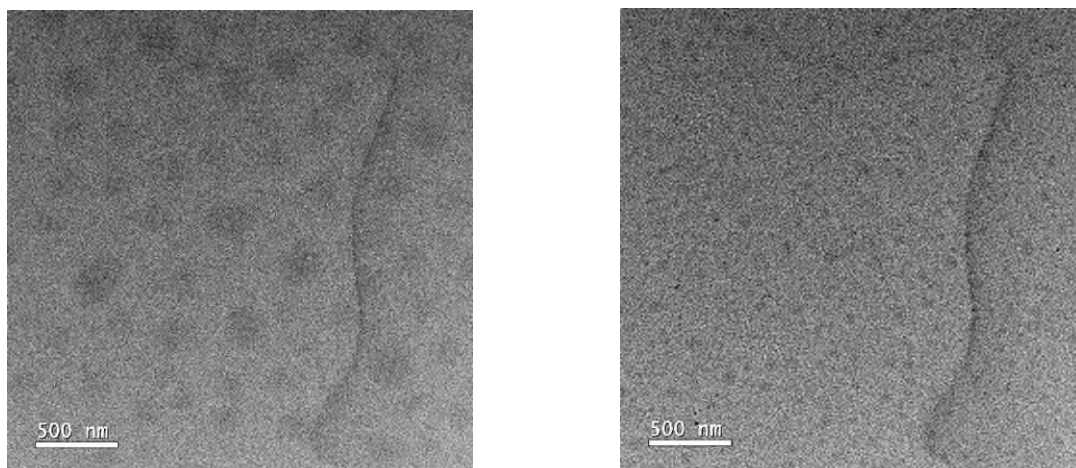

Figure S48: TEM pictures taken for high molecular weight PHB, functionalised with DMPP (left) and Bu<sub>3</sub>P (right), respectively. Samples were prepared by drying aqueous polymer suspensions.

## 1.4 Control experiments on small molecules

### 1.4.1 Crotonic acid and DMPP

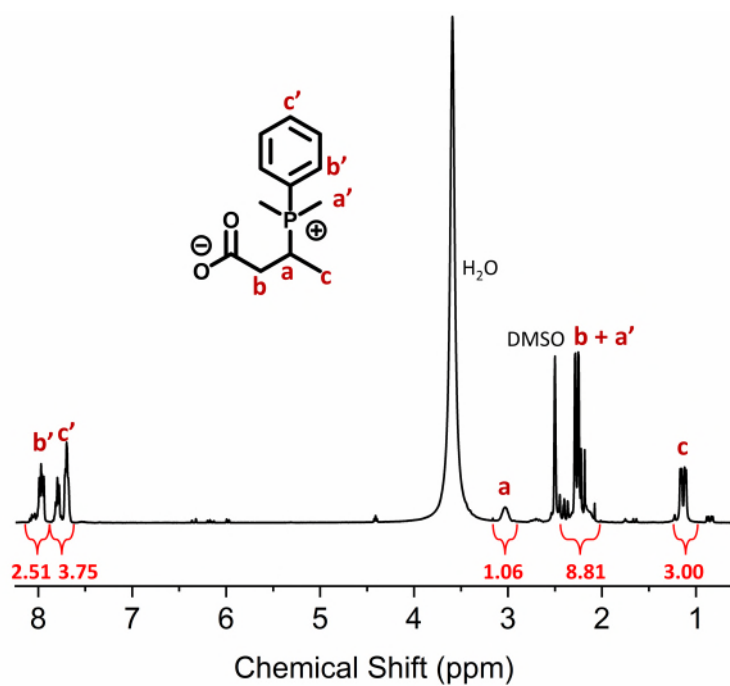

Figure S49:  $^1\text{H}$ -NMR (400 MHz,  $\text{DMSO-d}_6$ ) of crotonic acid functionalised with DMPP.

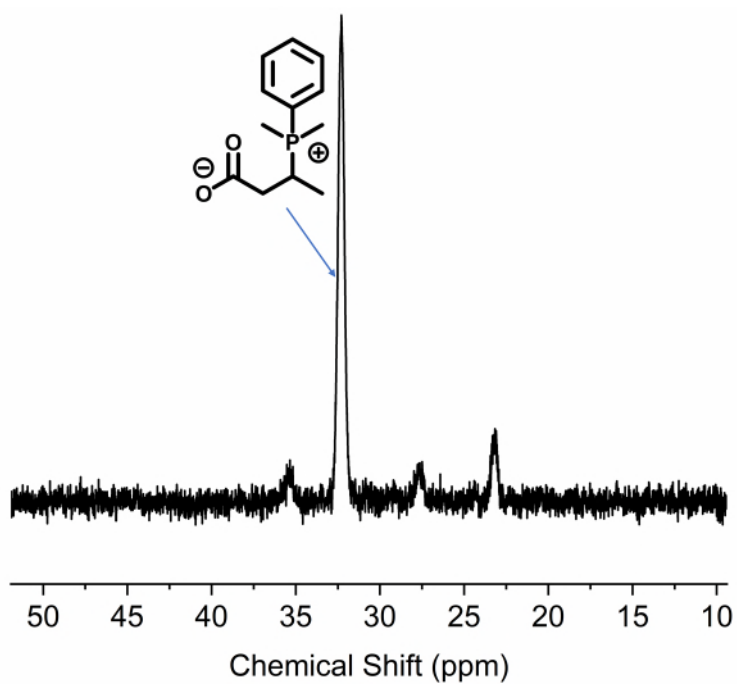

Figure S50:  $^{31}\text{P}$ -NMR (162 MHz,  $\text{DMSO-d}_6$ ) of crotonic acid functionalised with DMPP.

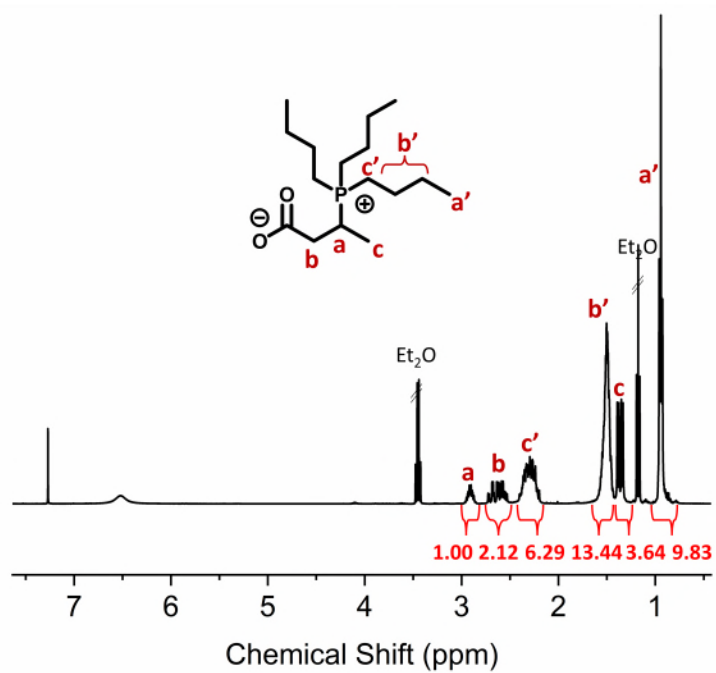

Figure S51:  $^1\text{H}$ -NMR (400 MHz,  $\text{CDCl}_3$ ) of crotonic acid functionalised with  $\text{Bu}_3\text{P}$ .

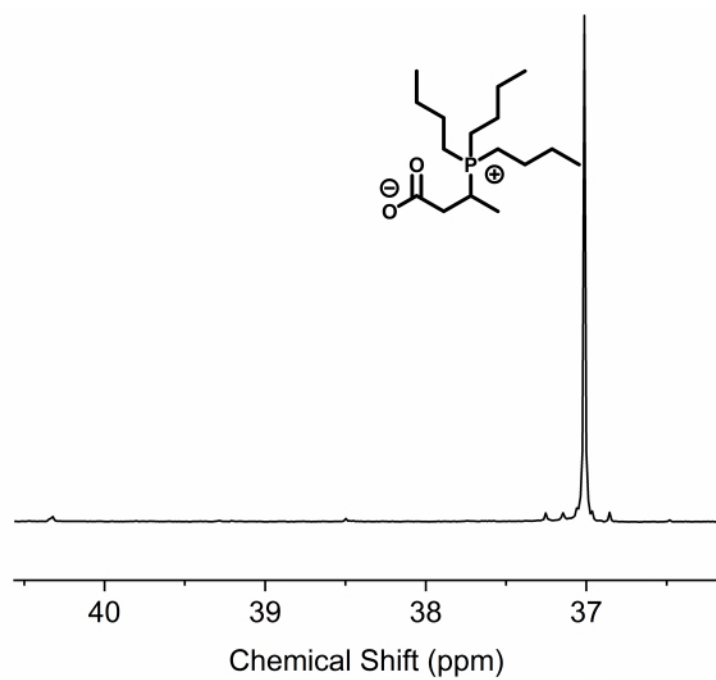

Figure S52:  $^{31}\text{P}$ -NMR (162 MHz,  $\text{DMSO-d}_6$ ) of crotonic acid functionalised with  $\text{Bu}_3\text{P}$ .

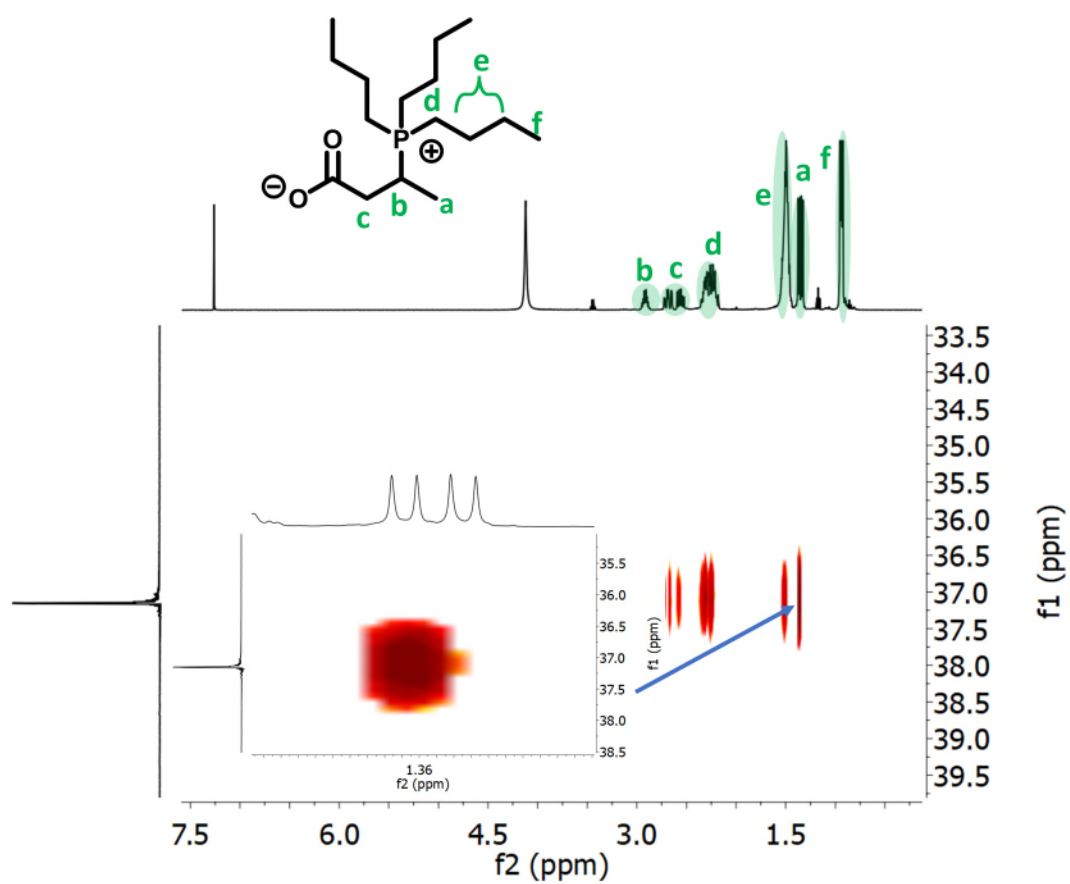

Figure S53:  $^1\text{H}$ - $^{31}\text{P}$  correlation NMR (500 MHz  $^1\text{H}$ ; 200 MHz  $^{31}\text{P}$ ,  $\text{CDCl}_3$ ) of crotonic acid functionalised with  $\text{Bu}_3\text{P}$ .

#### 1.4.2 Methyl crotonate/*n*-butyric acid and DMPP

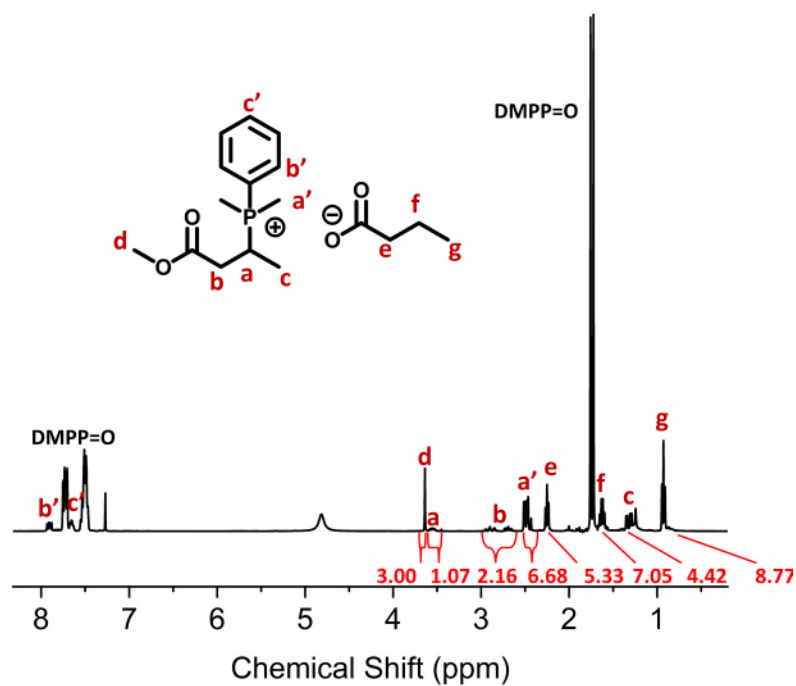

Figure S54:  $^1\text{H}$ -NMR (400 MHz,  $\text{CDCl}_3$ ) of Methyl-crotonate functionalised with DMPP and *n*-butyric acid.

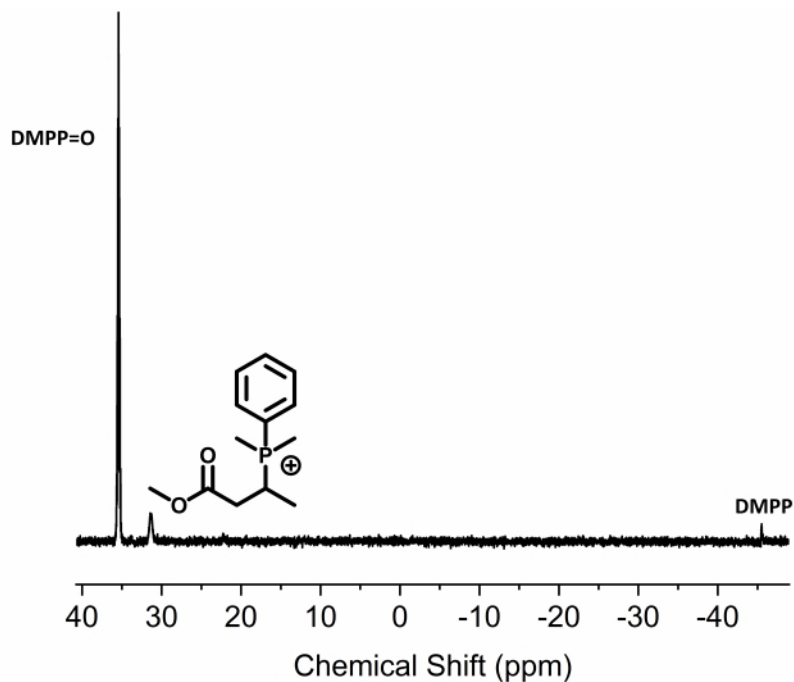

Figure S55:  $^{31}\text{P}$ -NMR (162 MHz,  $\text{CDCl}_3$ ) of Methyl-crotonate functionalised with DMPP.

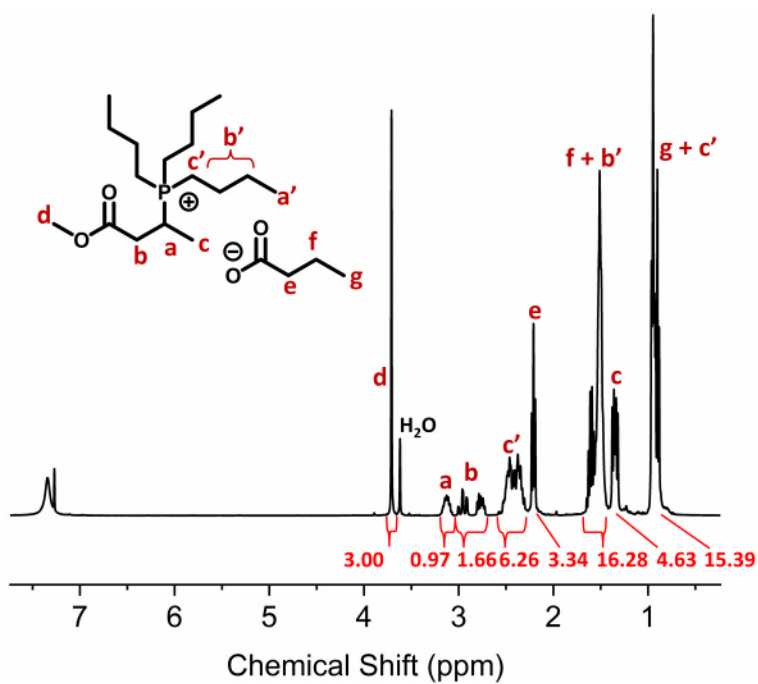

Figure S56:  $^1\text{H}$ -NMR (400 MHz,  $\text{CDCl}_3$ ) of Methyl-crotonate functionalised with  $\text{Bu}_3\text{P}$  and  $n$ -butyric acid.

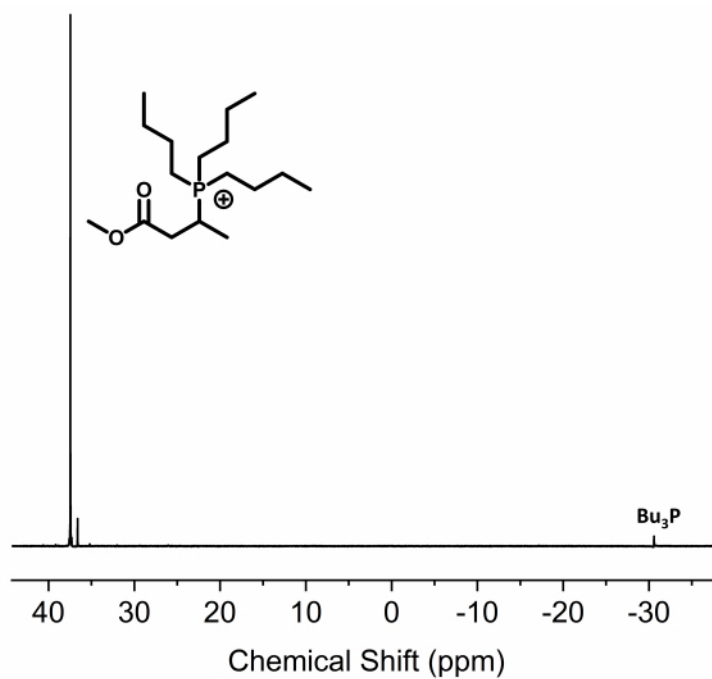

Figure S57:  $^{31}\text{P}$ -NMR (162 MHz,  $\text{CDCl}_3$ ) of Methyl-crotonate functionalised with  $\text{Bu}_3\text{P}$ .

### 1.4.3 Self-assembly as a function of salt and pH

*NaCl*

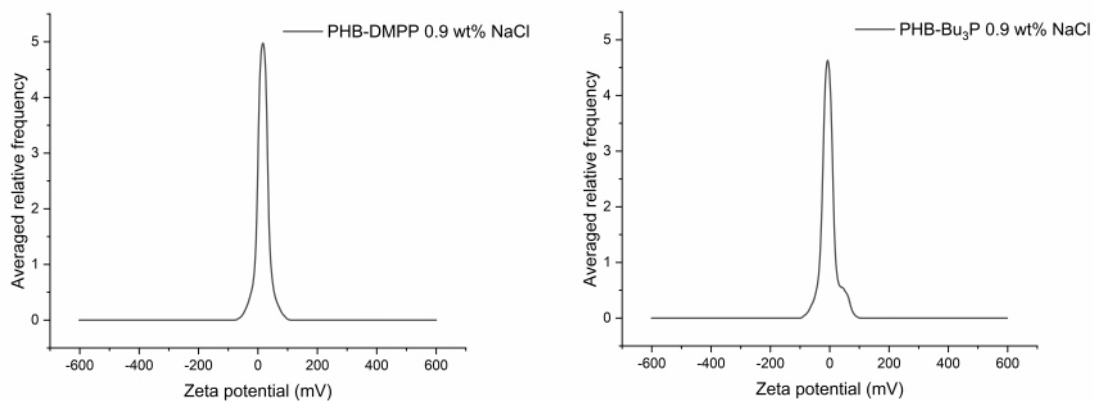

Figure S58: Zeta potential recorded for low molecular weight functionalised PHB measured in 0.9 wt% NaCl solution.

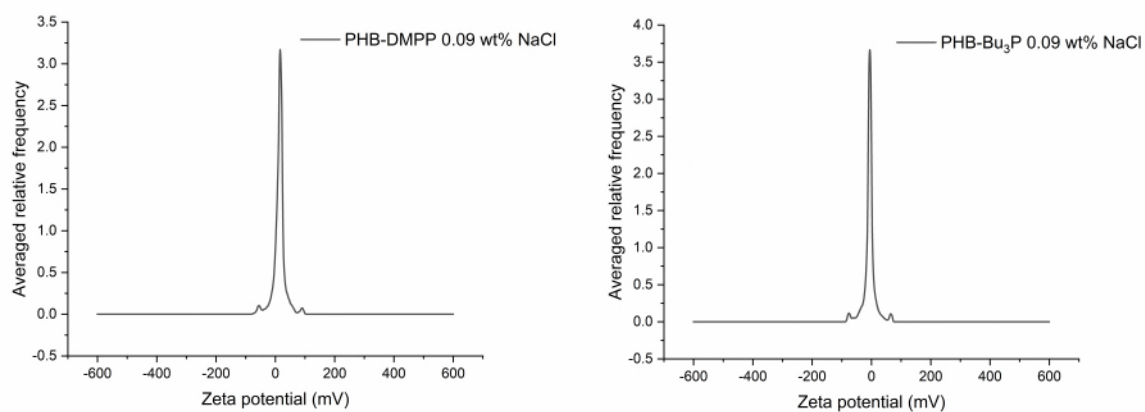

Figure S59: Zeta potential recorded for low molecular weight functionalised PHB measured in 0.09 wt% NaCl solution.

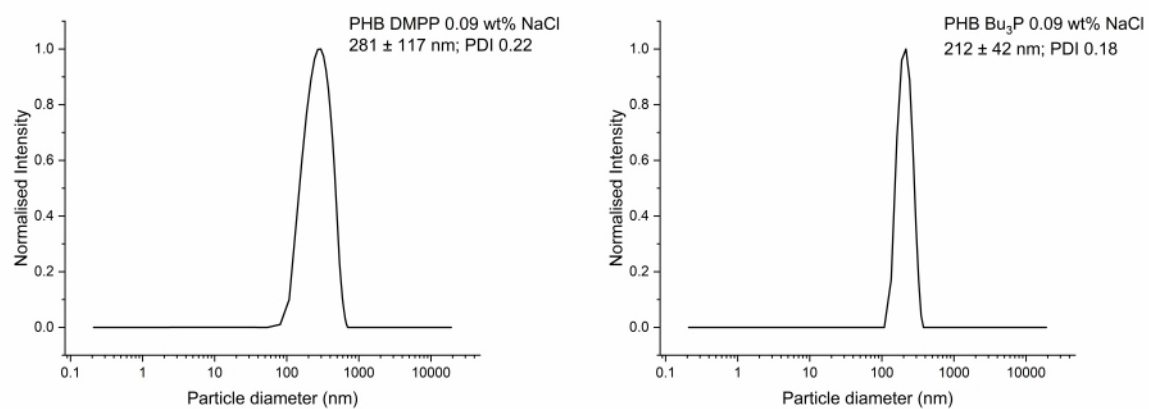

Figure S60: DLS recorded for low molecular weight functionalised PHB measured in 0.09 wt% NaCl solution.

pH 4

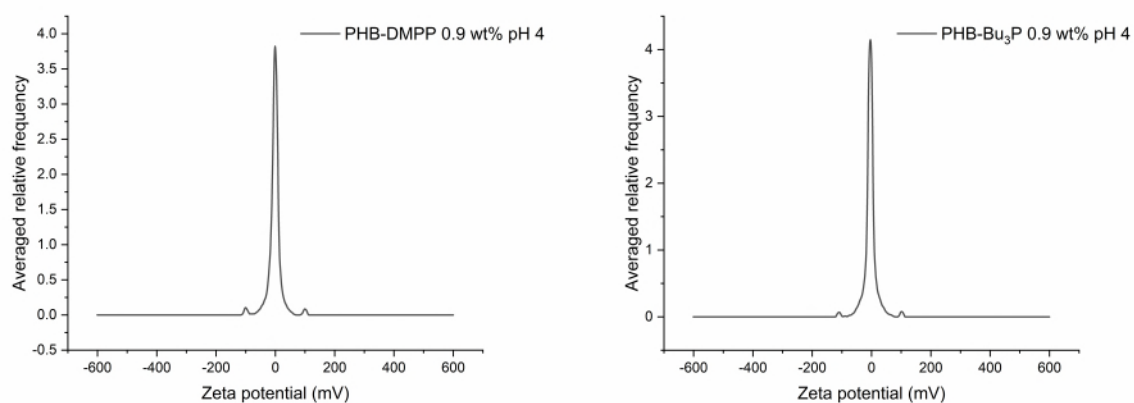

Figure S61: Zeta potential recorded for low molecular weight functionalised PHB measured in pH 4 0.9 wt% buffer solution.

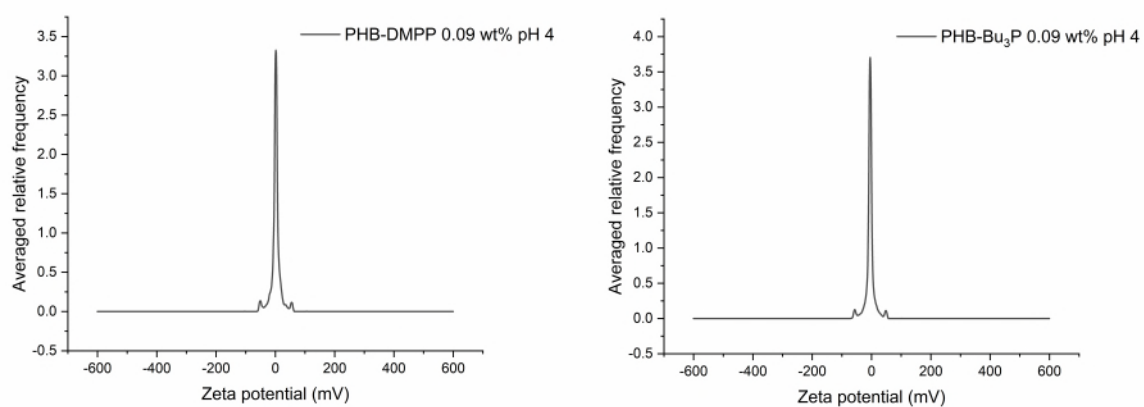

Figure S62: Zeta potential recorded for low molecular weight functionalised PHB measured in pH 4 0.09 wt% buffer solution.

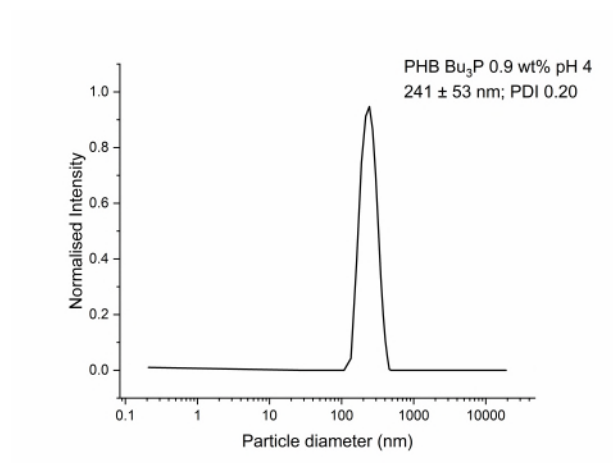

Figure S63:DLS recorded for low molecular weight functionalised PHB-Bu<sub>3</sub>P measured in pH 4 0.9 wt% buffer solution.

pH 7

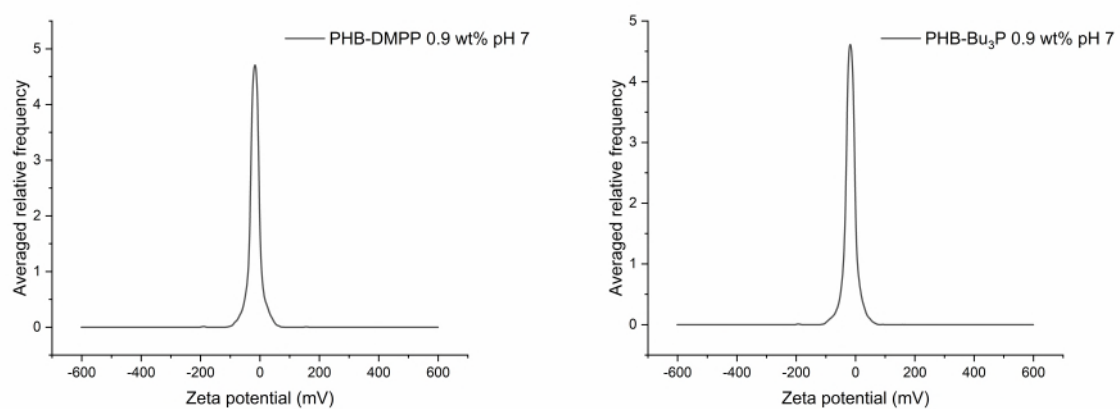

Figure S64: Zeta potential recorded for low molecular weight functionalised PHB measured in pH 7 0.9 wt% buffer solution.

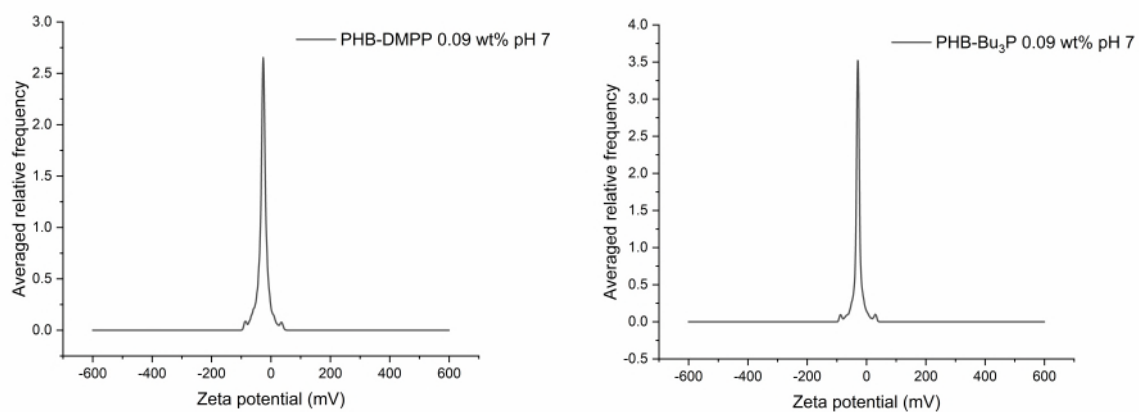

Figure S65: Zeta potential recorded for low molecular weight functionalised PHB measured in pH 7 0.09 wt% buffer solution.

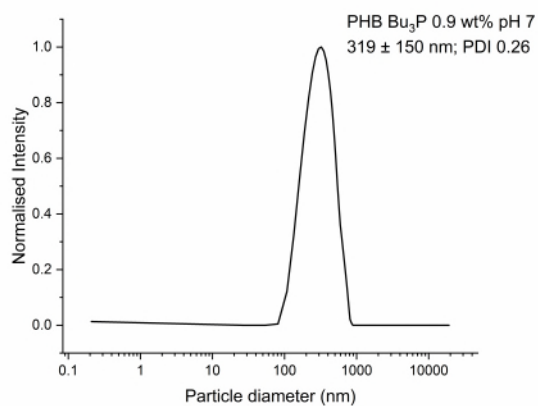

Figure S66:DLS recorded for low molecular weight functionalised PHB Bu<sub>3</sub>P measured in pH 7 0.9 wt% buffer solution.

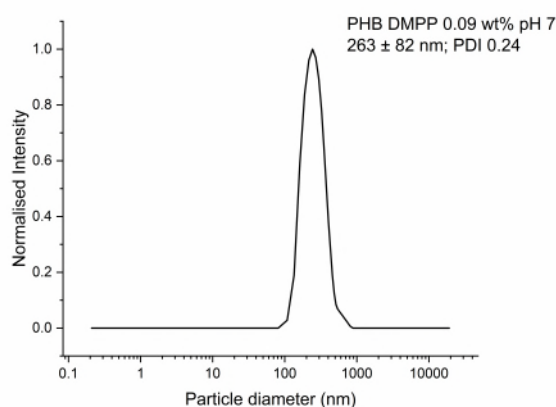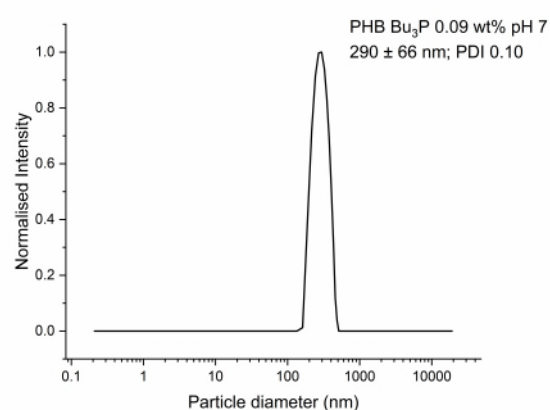

Figure S67:DLS recorded for low molecular weight functionalised PHB measured in pH 7 0.09 wt% buffer solution.

pH 9

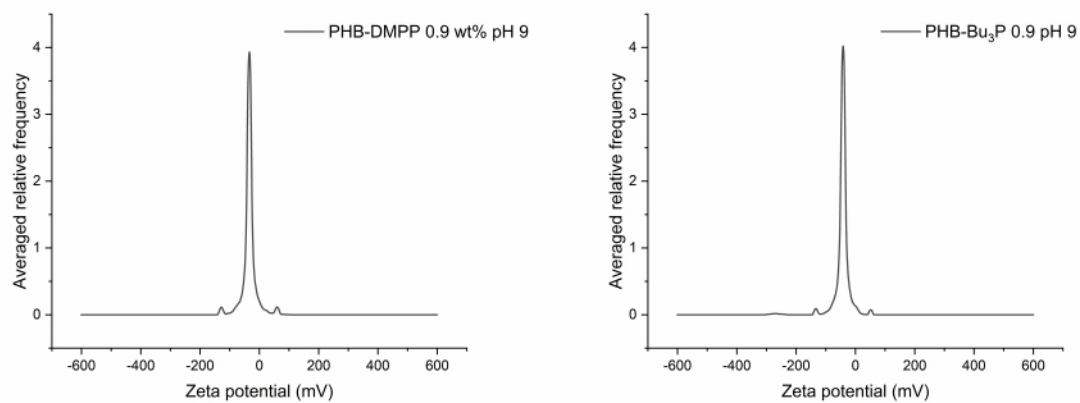

Figure S68:Zeta potential recorded for low molecular weight functionalised PHB measured in pH 9 0.9 wt% buffer solution.

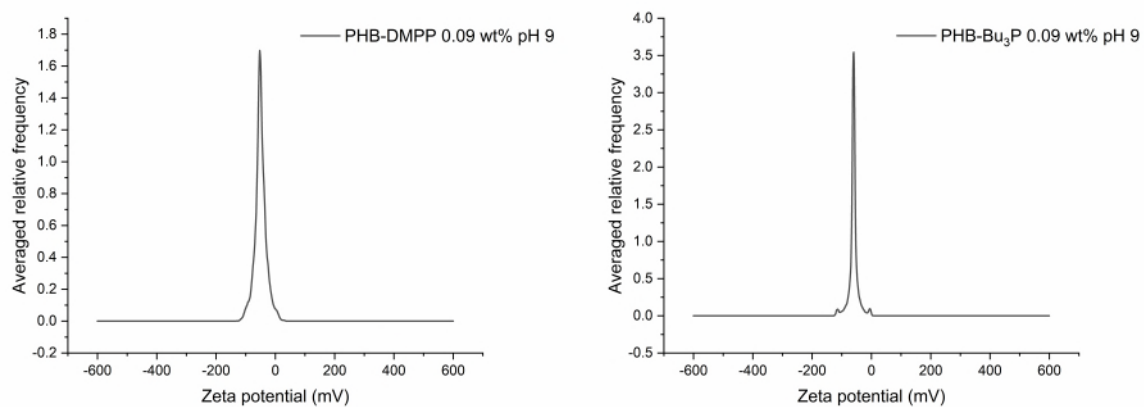

Figure S69:Zeta potential recorded for low molecular weight functionalised PHB measured in pH 9 0.09 wt% buffer solution.

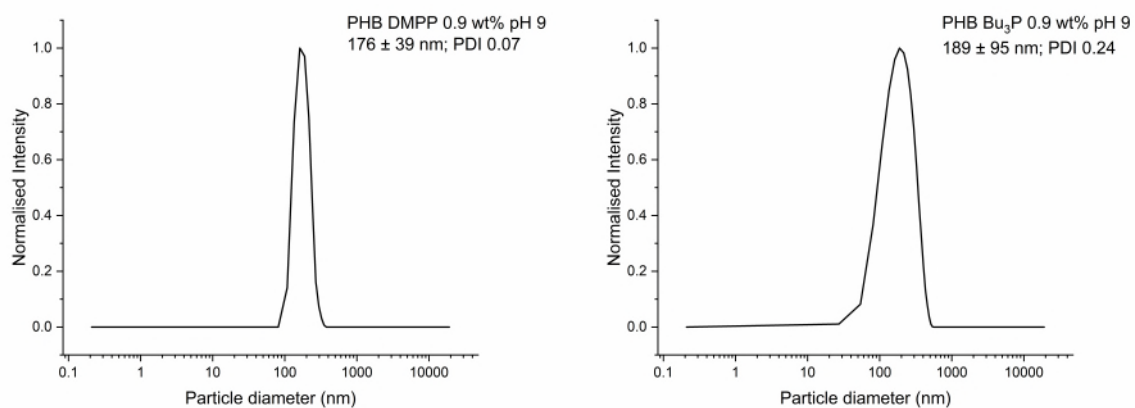

Figure S70: DLS recorded for low molecular weight functionalised PHB measured in pH 9 0.9 wt% buffer solution.

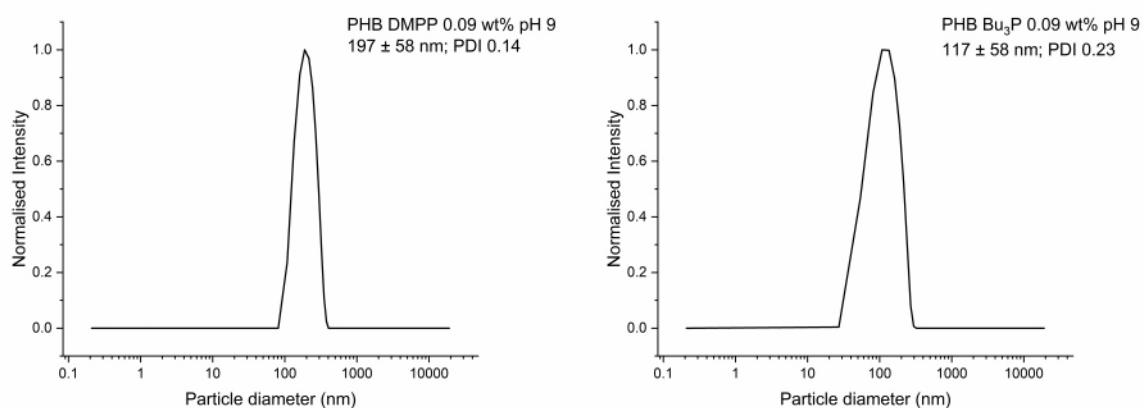

Figure S71: DLS recorded for low molecular weight functionalised PHB measured in pH 9 0.09 wt% buffer solution.

## 1.5 Degradation Experiment

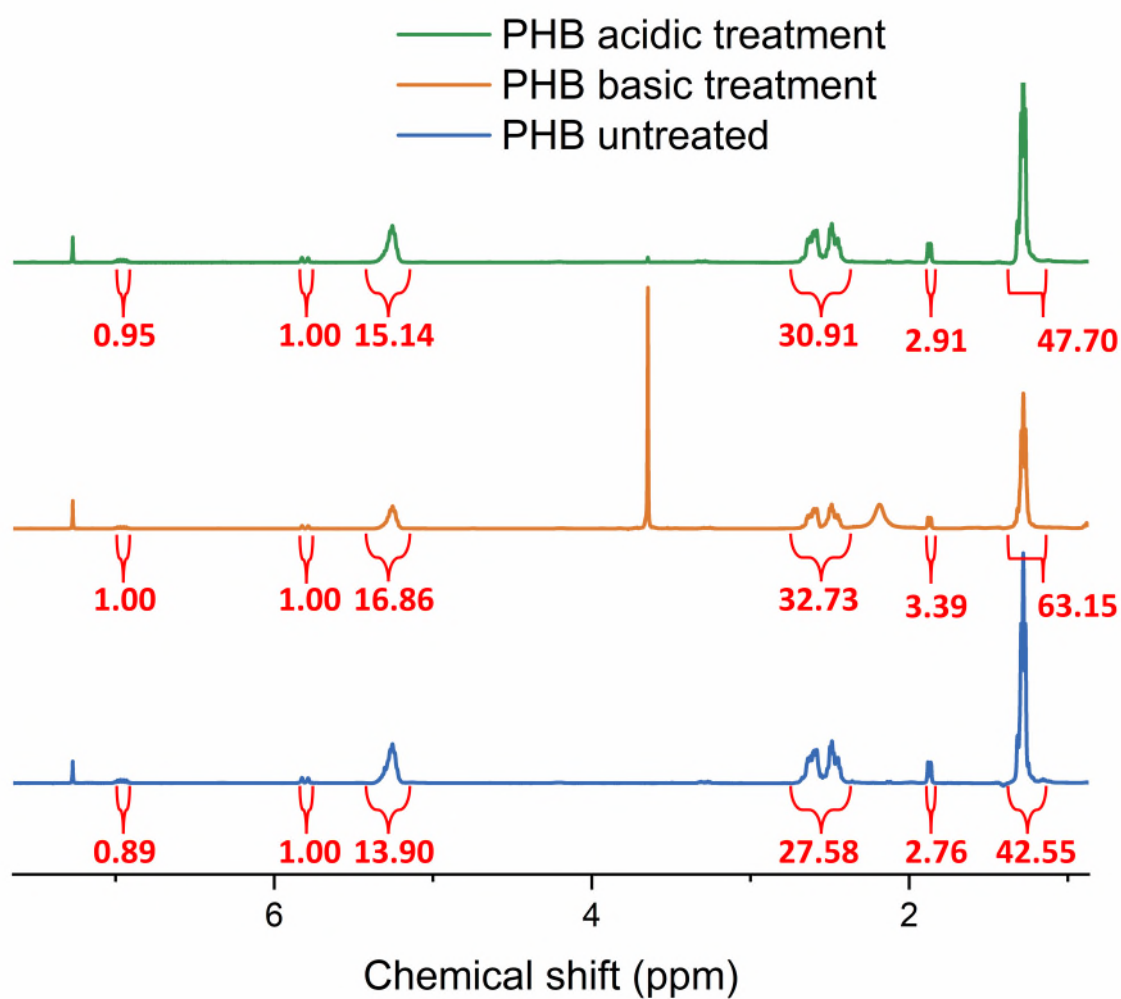

Figure S72: <sup>1</sup>H-NMR (400 MHz, CDCl<sub>3</sub>) Comparison of untreated PHB to PHB treated with 0.9 wt% basic and acidic buffer. The Increase of the molecular weight is attributed to the loss of low molecular weight chains during purification of the samples.

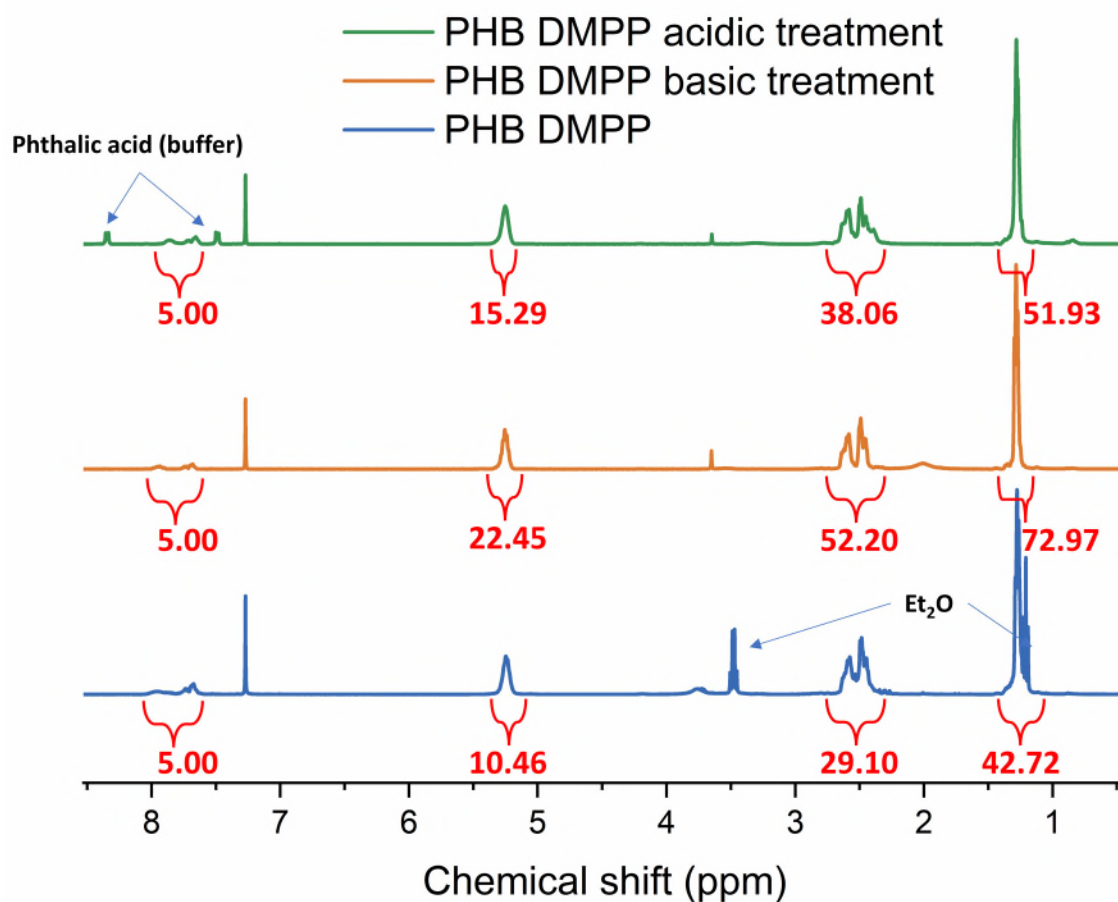

Figure S73: <sup>1</sup>H-NMR (400 MHz, CDCl<sub>3</sub>) Comparison of untreated PHB-DMPP to PHB-DMPP treated with 0.9 wt% basic and acidic buffer. The Increase of the molecular weight is attributed to the loss of low molecular weight chains during purification of the samples.
